# Supplementary material for: Mechanism and thermal rate constants for complete series reactions of bromochlorophenols with H
Source: Royal Society of Chemistry journal article supplement (doi:10.1039/c7ra12781b), 2018-01-01
Supplement: c7ra12781b1.pdf [file c7ra12781b1.pdf]

**Supplementary information for**

**Mechanism and thermal rate constants for complete series  
reactions of bromochlorophenols with H**

Siyuan Zheng, Xianwei Zhao, Yunfeng Li, Fei Xu,\* Qingzhu Zhang

Environment Research Institute, Shandong University, Jinan 250100, P. R. China

**Keywords**

PBCDD/Fs, Bromochlorophenols, H atom, Reaction mechanism, Rate constants

---

\*Corresponding author. E-mail: xufei@sdu.edu.cn

Fax: 86-531-61990

Thirty four pages

Contains six tables and four figures

**Table S1.** Comparison of the bond lengths of C–O and O–H bonds (in Å) of the selected BCPs, the O–H bond dissociation enthalpies BDH (in kcal/mol, 298.15 K) for bromochlorophenols (BCPs) and the standard enthalpies of the formation  $\Delta_R H_{298}^\circ$  for reactions of BCPs + OH  $\rightarrow$  BCPRs + H<sub>2</sub>O (in kcal/mol, 298.15 K) at MPWB1K/6-311+G(3df,2p)//MPWB1K/6-31+G(d,p) level involving in this study and those at M062X/6-311+G(3df,2p)//M062X/6-311+G(d,p) level by Saeed.<sup>68</sup> (Reproduced with permission from A. Saeed.<sup>68</sup> Copyright 2015, American Chemical Society).

**Table S2.** Imaginary frequencies  $\nu$  (in cm<sup>-1</sup>), zero point energies and total energies of the transition states involved in this study and the O-H bond dissociation energies  $D_0(\text{O-H})$  (in kcal/mol, 0 K, including ZPE correction) of the reactions of bromochlorophenols (BCPs) with H. For comparison, the  $D_0(\text{O-H})$  of the reactions of bromophenols (BPs)<sup>a</sup> and chlorophenols (CPs)<sup>b</sup> with H are also provided (<sup>a</sup> Reproduced with permission from R. Gao et al.<sup>53</sup> Copyright 2013, Elsevier. <sup>b</sup> Reproduced with permission from Q. Z. Zhang et al.<sup>52</sup> Copyright 2009, American Chemical Society).

**Table S3.** Potential barrier  $\Delta E_0$  (in kcal/mol, 0 K, including ZPE correction) and reaction heat  $\Delta H_0$  (in kcal/mol, 0 K, including ZPE correction) for reactions of anti-BCPs with H. For comparison,  $\Delta E_0$  and  $\Delta H_0$  of reactions of anti-BPs<sup>a</sup> and anti-CPs<sup>b</sup> with H are also calculated. (<sup>a</sup>Reproduced with permission from R. Gao et al.<sup>29</sup>

Copyright 2013, Elsevier. <sup>b</sup>Reproduced with permission from Q. Z. Zhang et al.<sup>28</sup>

Copyright 2009, American Chemical Society).

**Table S4.** Arrhenius formulas for reaction of the anti-BCPs with H over the temperature range 600–1200 K ( $\text{cm}^3 \text{ molecule}^{-1} \text{ s}^{-1}$ )

**Table S5.** CVT/SCT rate constants for the reactions of the bromochlorophenols (BCPs) with H over the temperature range of 600–1200 K ( $\text{cm}^3 \text{ molecule}^{-1} \text{ s}^{-1}$ ).

**Table S6.** CVT/SCT rate constants for the reactions of the anti-BCPs with H over the temperature range of 600–1200 K ( $\text{cm}^3 \text{ molecule}^{-1} \text{ s}^{-1}$ ).

**Figure S1.** Energy difference between syn- and anti-conformers of BCPs (in kcal/mol, 0 K, including ZPE correction). Calculated at the MPWB1K/6-311+G(3df,2p)//MPWB1K/6-31+G(d,p) level of theory.

**Figure S2.** MPWB1K/6-31+G(d,p) optimized geometries for 96 congeners of bromochlorophenols (BCPs). Distances are in angstroms. Gray sphere, C; white sphere, H; red sphere, O; blue sphere, Br; green sphere, Cl;

**Figure S3.** MPWB1K/6-31+G(d,p) optimized geometries for transition states of 96 congeners of bromochlorophenols with H. Distances are in angstroms. Gray sphere, C; white sphere, H; red sphere, O; blue sphere, Br; green sphere, Cl;

**Figure S4.** MPWB1K/6-31+G(d,p) optimized geometries for 96 congeners of bromochlorophenoxy radicals (BCPRs). Distances are in angstroms. Gray sphere, C; white sphere, H; red sphere, O; green sphere, Cl; blue sphere, Br.

**Table S1.** Comparison of the bond lengths of C–O and O–H bonds (in Å) of the selected BCPs, the O–H bond dissociation enthalpies BDH (in kcal/mol, 298.15 K) for bromochlorophenols (BCPs) and the standard enthalpies of the formation  $\Delta_R H_{298}^\circ$  for reactions of BCPs + OH  $\rightarrow$  BCPRs + H<sub>2</sub>O (in kcal/mol, 298.15 K) at MPWB1K/6-311+G(3df,2p)//MPWB1K/6-31+G(d,p) level involving in this study and those at M062X/6-311+G(3df,2p)//M062X/6-311+G(d,p) level by Saeed.<sup>68</sup> (Reproduced with permission from A. Saeed.<sup>68</sup> Copyright 2015, American Chemical Society).

| BCP            | C–O    |       | O–H    |       | BDH    |       | $\Delta_R H_{298}^\circ$ |        |
|----------------|--------|-------|--------|-------|--------|-------|--------------------------|--------|
|                | MPWB1K | M062X | MPWB1K | M062X | MPWB1K | M062  | MPWB1K                   | M062X  |
| 3B-2CP         | 1.338  | 1.352 | 0.958  | 0.961 | 94.35  | 93.27 | -26.01                   | -25.47 |
| 4B-3CP         | 1.346  | 1.357 | 0.954  | 0.961 | 91.68  | 91.26 | -28.68                   | -27.47 |
| 2B-4CP         | 1.339  | 1.430 | 0.959  | 0.960 | 92.64  | 91.83 | -27.72                   | -26.90 |
| 3B-2,4DCP      | 1.337  | 1.352 | 0.959  | 0.961 | 92.95  | 92.19 | -25.08                   | -26.54 |
| 4B-2,3,6TCP    | 1.331  | -     | 0.959  | -     | 91.88  | 90.93 | -28.48                   | -27.81 |
| 3B-4,5,6TCP    | 1.335  | 1.349 | 0.959  | 0.961 | 93.71  | 93.03 | -26.65                   | -25.71 |
| 2B-3,4,5,6TeCP | 1.329  | 1.339 | 0.960  | 0.966 | 92.26  | 92.00 | -28.10                   | -26.73 |
| 3,4DB-2CP      | 1.336  | 1.352 | 0.958  | 0.961 | 93.25  | 92.45 | -27.11                   | -26.26 |
| 2,6DB-4CP      | 1.332  | 1.342 | 0.960  | 0.965 | 91.25  | 90.54 | -29.11                   | -28.17 |
| 2,3DB-4CP      | 1.337  | 1.352 | 0.960  | 0.961 | 93.19  | 92.53 | -27.17                   | -26.21 |
| 3,5DB-2,4DCP   | 1.335  | 1.349 | 0.959  | 0.961 | 93.85  | 93.08 | -26.51                   | -25.66 |
| 2,3DB-4,6DCP   | 1.330  | 1.340 | 0.960  | 0.965 | 91.66  | 91.02 | -28.70                   | -27.71 |
| 2,3DB-4,5,6TCP | 1.329  | 1.339 | 0.961  | 0.966 | 92.25  | 91.50 | -28.11                   | -27.21 |
| 2,4,5TB-3CP    | 1.334  | 1.349 | 0.960  | 0.961 | 94.53  | 93.70 | -25.83                   | -25.01 |
| 2,3,5TB-4CP    | 1.335  | 1.349 | 0.961  | 0.961 | 94.58  | 93.36 | -25.78                   | -25.37 |
| 2,3,6TB-4CP    | 1.331  | 1.342 | 0.961  | 0.966 | 91.74  | 91.19 | -28.62                   | -27.55 |
| 3,4,5TB-2,6DCP | 1.330  | 1.340 | 0.960  | 0.965 | 92.16  | 91.52 | -28.20                   | -27.21 |
| 2,3,6TB-4,5DCP | 1.330  | 1.339 | 0.961  | 0.966 | 92.21  | 91.74 | -28.20                   | -27.00 |
| 2,3,5,6TeB-4CP | 1.331  | 1.430 | 0.961  | 0.960 | 92.14  | 91.57 | -28.22                   | -27.16 |

**Table S2.** Imaginary frequencies  $\nu$  (in  $\text{cm}^{-1}$ ), zero point energies and total energies of the transition states involved in this study and the O-H bond dissociation energies  $D_0(\text{O-H})$  (in kcal/mol, 0 K, including ZPE correction) of the reactions of bromochlorophenols (BCPs) with H. For comparison, the  $D_0(\text{O-H})$  of the reactions of bromophenols (BPs)<sup>a</sup> and chlorophenols (CPs)<sup>b</sup> with H are also provided (<sup>a</sup> Reproduced with permission from R. Gao et al.<sup>53</sup> Copyright 2013, Elsevier. <sup>b</sup> Reproduced with permission from Q. Z. Zhang et al.<sup>52</sup> Copyright 2009, American Chemical Society).

| BCP       | $\nu$  | ZPE     | Total energy | $D_0(\text{O-H})$ | BP        | $D_0(\text{O-H})^a$ | CP        | $D_0(\text{O-H})^b$ |
|-----------|--------|---------|--------------|-------------------|-----------|---------------------|-----------|---------------------|
| 2B-3CP    | -2214i | 0.08526 | -3341.45531  | 86.82             | 2,3-DBP   | 86.71               | 2,3-DCP   | 86.71               |
| 3B-2CP    | -2223i | 0.08530 | -3341.45485  | 86.62             |           |                     |           |                     |
| 2B-4CP    | -2228i | 0.08499 | -3341.45836  | 84.89             | 2,4-DBP   | 84.11               | 2,4-DCP   | 85.58               |
| 4B-2CP    | -2232i | 0.08521 | -3341.45821  | 84.94             |           |                     |           |                     |
| 2B-5CP    | -2212i | 0.08523 | -3341.45792  | 86.89             | 2,5-DBP   | 86.92               | 2,5-DCP   | 86.77               |
| 3B-6CP    | -2219i | 0.08504 | -3341.45762  | 86.78             |           |                     |           |                     |
| 2B-6CP    | -2235i | 0.08475 | -3341.45634  | 84.83             | 2,6-DBP   | 84.94               | 2,6-DCP   | 84.66               |
| 3B-4CP    | -2200i | 0.08485 | -3341.45501  | 83.76             | 3,4-DBP   | 84.04               | 3,4-DCP   | 83.89               |
| 4B-3CP    | -2202i | 0.08509 | -3341.45499  | 84.02             |           |                     |           |                     |
| 3B-5CP    | -2202i | 0.08441 | -3341.45683  | 86.08             | 3,5-DBP   | 86.03               | 3,5-DCP   | 86.17               |
| 2B-3,4DCP | -2232i | 0.07562 | -3801.13313  | 85.55             | 2,3,4-TBP | 85.71               | 2,3,4-TCP | 85.37               |
| 3B-2,4DCP | -2233i | 0.07598 | -3801.13249  | 85.23             |           |                     |           |                     |
| 4B-2,3DCP | -2236i | 0.07580 | -3801.13282  | 85.67             |           |                     |           |                     |
| 2,3DB-4CP | -2235i | 0.07630 | -5915.33243  | 85.43             |           |                     |           |                     |
| 2,4DB-3CP | -2236i | 0.07606 | -5915.33282  | 85.82             |           |                     |           |                     |
| 3,4DB-2CP | -2231i | 0.07619 | -5915.33194  | 85.54             |           |                     |           |                     |
| 2B-3,5DCP | -2209i | 0.07573 | -3801.13515  | 87.71             | 2,3,5-TBP | 87.49               | 2,3,5-TCP | 87.50               |
| 3B-2,5DCP | -2218i | 0.07548 | -3801.13481  | 87.41             |           |                     |           |                     |
| 3B-5,6DCP | -2211i | 0.07543 | -3801.13501  | 87.36             |           |                     |           |                     |
| 2,3DB-5CP | -2211i | 0.07607 | -5915.33478  | 87.59             |           |                     |           |                     |
| 2,5DB-3CP | -2209i | 0.07553 | -5915.33512  | 87.59             |           |                     |           |                     |
| 3,5DB-2CP | -2209i | 0.07548 | -5915.33486  | 87.37             |           |                     |           |                     |
| 2B-3,6DCP | -2232i | 0.07545 | -3801.13387  | 85.32             | 2,3,6-TBP | 85.30               | 2,3,6-TCP | 85.11               |
| 2B-5,6DCP | -2231i | 0.07517 | -3801.13398  | 85.26             |           |                     |           |                     |
| 3B-2,6DCP | -2239i | 0.07555 | -3801.13362  | 85.08             |           |                     |           |                     |
| 2,3DB-6CP | -2227i | 0.07593 | -5915.33360  | 85.14             |           |                     |           |                     |
| 2,5DB-6CP | -2239i | 0.07545 | -5915.33380  | 85.14             |           |                     |           |                     |
| 2,6DB-3CP | -2215i | 0.07548 | -5915.33402  | 85.49             |           |                     |           |                     |

**Table S2. Cont.**

| BCP          | $\nu$  | ZPE     | Total energy | $D_0(\text{O-H})$ | BP           | $D_0(\text{O-H})^a$ | CP           | $D_0(\text{O-H})^b$ |
|--------------|--------|---------|--------------|-------------------|--------------|---------------------|--------------|---------------------|
| 2B-4,5DCP    | -2235i | 0.07514 | -3801.13594  | 85.56             | 2,4,5-TBP    | 85.86               | 2,4,5-TCP    | 85.37               |
| 3B-4,6DCP    | -2232i | 0.07556 | -3801.13533  | 85.30             |              |                     |              |                     |
| 4B-2,5DCP    | -2235i | 0.07575 | -3801.13543  | 85.71             |              |                     |              |                     |
| 2,4DB-5CP    | -2230i | 0.07582 | -5915.33578  | 85.84             |              |                     |              |                     |
| 2,5DB-4CP    | -2232i | 0.07546 | -5915.33564  | 85.60             |              |                     |              |                     |
| 3,4DB-6CP    | -2229i | 0.07595 | -5915.33489  | 85.65             |              |                     |              |                     |
| 2B-4,6DCP    | -2236i | 0.07513 | -3801.13669  | 83.42             | 2,4,6-TBP    | 83.76               | 2,4,6-TCP    | 83.29               |
| 4B-2,6DCP    | -2239i | 0.07522 | -3801.13633  | 83.53             |              |                     |              |                     |
| 2,4DB-6CP    | -2240i | 0.07504 | -5915.33669  | 83.68             |              |                     |              |                     |
| 2,6DB-4CP    | -2196i | 0.07492 | -5915.33673  | 83.48             |              |                     |              |                     |
| 3B-4,5DCP    | -2210i | 0.07539 | -3801.13188  | 84.66             | 3,4,5-TBP    | 85.11               | 3,4,5-TCP    | 84.79               |
| 4B-3,5DCP    | -2207i | 0.07535 | -3801.13159  | 85.11             |              |                     |              |                     |
| 3,4DB-5CP    | -2210i | 0.07606 | -5915.33117  | 85.07             |              |                     |              |                     |
| 3,5DB-4CP    | -2207i | 0.07571 | -5915.33164  | 84.71             |              |                     |              |                     |
| 2B-3,4,5TCP  | -2232i | 0.06564 | -4260.80952  | 86.32             | 2,3,4,5-TeBP | 87.37               | 2,3,4,5-TeCP | 86.14               |
| 3B-2,4,5TCP  | -2234i | 0.06618 | -4260.80884  | 86.16             |              |                     |              |                     |
| 3B-4,5,6TCP  | -2226i | 0.06581 | -4260.80911  | 85.97             |              |                     |              |                     |
| 4B-2,3,5TCP  | -2230i | 0.06616 | -4260.80883  | 86.48             |              |                     |              |                     |
| 2,3DB-4,5DCP | -2231i | 0.06637 | -6375.00873  | 86.43             |              |                     |              |                     |
| 2,4DB-3,5DCP | -2227i | 0.06647 | -6375.00899  | 86.79             |              |                     |              |                     |
| 2,5DB-3,4DCP | -2224i | 0.06607 | -6375.00931  | 87.03             |              |                     |              |                     |
| 3,4DB-2,5DCP | -2227i | 0.06721 | -6375.00800  | 86.47             |              |                     |              |                     |
| 3,4DB-5,6DCP | -2232i | 0.06614 | -6375.00834  | 86.41             |              |                     |              |                     |
| 3,5DB-2,4DCP | -2233i | 0.06635 | -6375.00872  | 86.14             |              |                     |              |                     |
| 2,3,4TB-5CP  | -2230i | 0.06677 | -8489.20776  | 87.03             |              |                     |              |                     |
| 2,3,5TB-4CP  | -2230i | 0.06632 | -8489.20847  | 86.84             |              |                     |              |                     |
| 2,4,5TB-3CP  | -2227i | 0.06691 | -8489.20848  | 86.80             |              |                     |              |                     |
| 3,4,5TB-2CP  | -2230i | 0.06759 | -8489.20752  | 86.50             |              |                     |              |                     |
| 2B-3,4,6TCP  | -2237i | 0.06573 | -4260.81093  | 83.99             | 2,3,4,6-TeBP | 84.35               | 2,3,4,6-TeCP | 83.93               |
| 2B-4,5,6TCP  | -2237i | 0.06532 | -4260.81102  | 83.85             |              |                     |              |                     |
| 3B-2,4,6TCP  | -2241i | 0.06588 | -4260.81044  | 83.87             |              |                     |              |                     |
| 4B-2,3,6TCP  | -2239i | 0.06602 | -4260.81056  | 84.19             |              |                     |              |                     |
| 2,3DB-4,6DCP | -2234i | 0.06656 | -6375.01033  | 83.90             |              |                     |              |                     |
| 2,4DB-3,6DCP | -2241i | 0.06604 | -6375.01087  | 84.38             |              |                     |              |                     |
| 2,4DB-5,6DCP | -2240i | 0.06612 | -6375.01085  | 84.04             |              |                     |              |                     |
| 2,5DB-4,6DCP | -2238i | 0.06581 | -6375.01062  | 83.75             |              |                     |              |                     |
| 2,6DB-3,4DCP | -2209i | 0.06586 | -6375.01088  | 84.06             |              |                     |              |                     |

**Table S2. Cont.**

| BCP            | $\nu$  | ZPE     | Total energy | $D_0(\text{O-H})$ | BP           | $D_0(\text{O-H})^a$ | CP           | $D_0(\text{O-H})^b$ |
|----------------|--------|---------|--------------|-------------------|--------------|---------------------|--------------|---------------------|
| 3,4DB-2,6DCP   | -2243i | 0.06644 | -6375.00997  | 84.17             |              |                     |              |                     |
| 2,3,4TB-6CP    | -2235i | 0.06687 | -8489.20975  | 84.26             |              |                     |              |                     |
| 2,3,6TB-4CP    | -2208i | 0.06652 | -8489.21024  | 83.97             |              |                     |              |                     |
| 2,4,5TB-6CP    | -2239i | 0.06663 | -8489.21022  | 83.94             |              |                     |              |                     |
| 2,4,6TB-3CP    | -2210i | 0.06608 | -8489.21068  | 84.50             |              |                     |              |                     |
| 2B-3,5,6TCP    | -2236i | 0.06568 | -4260.81075  | 85.83             | 2,3,5,6-TeBP | 85.93               | 2,3,5,6-TeCP | 85.61               |
| 3B-2,5,6TCP    | -2243i | 0.06567 | -4260.81055  | 85.54             |              |                     |              |                     |
| 2,3DB-5,6DCP   | -2234i | 0.06579 | -6375.01046  | 85.71             |              |                     |              |                     |
| 2,5DB-3,6DCP   | -2232i | 0.06589 | -6375.01068  | 85.66             |              |                     |              |                     |
| 2,6DB-3,5DCP   | -2206i | 0.06604 | -6375.01047  | 85.76             |              |                     |              |                     |
| 3,5DB-2,6DCP   | -2238i | 0.06591 | -6375.01040  | 85.58             |              |                     |              |                     |
| 2,3,5TB-6CP    | -2239i | 0.06601 | -8489.21029  | 85.89             |              |                     |              |                     |
| 2,3,6TB-5CP    | -2210i | 0.06571 | -8489.21013  | 86.04             |              |                     |              |                     |
| 2B-3,4,5,6TeCP | -2239i | 0.05555 | -4720.48414  | 84.52             | PBP          | 84.76               | PCP          | 84.38               |
| 3B-2,4,5,6TeCP | -2246i | 0.05550 | -4720.48350  | 84.40             |              |                     |              |                     |
| 4B-2,3,5,6TeCP | -2248i | 0.05576 | -4720.48341  | 84.71             |              |                     |              |                     |
| 2,3DB-4,5,6TCP | -2240i | 0.05583 | -6834.68335  | 84.50             |              |                     |              |                     |
| 2,4DB-3,5,6TCP | -2247i | 0.05666 | -6834.68351  | 84.81             |              |                     |              |                     |
| 2,5DB-3,4,6TCP | -2245i | 0.05686 | -6834.68361  | 84.43             |              |                     |              |                     |
| 2,6DB-3,4,5TCP | -2213i | 0.05534 | -6834.68389  | 84.56             |              |                     |              |                     |
| 3,4DB-2,5,6TCP | -2246i | 0.05694 | -6834.68256  | 84.51             |              |                     |              |                     |
| 3,5DB-2,4,6TCP | -2245i | 0.05653 | -6834.68307  | 84.31             |              |                     |              |                     |
| 2,3,4TB-5,6DCP | -2243i | 0.05714 | -8948.88242  | 84.79             |              |                     |              |                     |
| 2,3,5TB-4,6DCP | -2243i | 0.05692 | -8948.88290  | 84.42             |              |                     |              |                     |
| 2,3,6TB-4,5DCP | -2213i | 0.05743 | -8948.88308  | 84.45             |              |                     |              |                     |
| 2,4,5TB-3,6DCP | -2242i | 0.05705 | -8948.88263  | 84.63             |              |                     |              |                     |
| 2,4,6TB-3,5DCP | -2214i | 0.05659 | -8948.88321  | 84.97             |              |                     |              |                     |
| 3,4,5TB-2,6DCP | -2241i | 0.05766 | -8948.88169  | 84.47             |              |                     |              |                     |
| 2,3,4,5TeB-6CP | -2239i | 0.05736 | -11063.08142 | 84.71             |              |                     |              |                     |
| 2,3,4,6TeB-5CP | -2215i | 0.05718 | -11063.08203 | 84.86             |              |                     |              |                     |
| 2,3,5,6TeB-4CP | -2211i | 0.05742 | -11063.08221 | 84.39             |              |                     |              |                     |

**Table S3.** Potential barrier  $\Delta E_0$  (in kcal/mol, 0 K, including ZPE correction) and reaction heat  $\Delta H_0$  (in kcal/mol, 0 K, including ZPE correction) for reactions of anti-BCPs with H. For comparison,  $\Delta E_0$  and  $\Delta H_0$  of reactions of anti-BPs<sup>a</sup> and anti-CPs<sup>b</sup> with H are also calculated. (<sup>a</sup>Reproduced with permission from R. Gao et al.<sup>29</sup> Copyright 2013, Elsevier. <sup>b</sup>Reproduced with permission from Q. Z. Zhang et al.<sup>28</sup> Copyright 2009, American Chemical Society).

| <b>BCP<sup>anti</sup></b>    | $\Delta E_0$ | $\Delta H_0$ | <b>BP<sup>anti</sup></b>     | $\Delta E_0^a$ | $\Delta H_0^a$ | <b>CP<sup>anti</sup></b>     | $\Delta E_0^b$ | $\Delta H_0^b$ |
|------------------------------|--------------|--------------|------------------------------|----------------|----------------|------------------------------|----------------|----------------|
| 2B-3CP <sup>anti</sup>       | 10.55        | -14.74       | 2,3-DBP <sup>anti</sup>      | 10.79          | -14.92         | 2,3-DCP <sup>anti</sup>      | 10.83          | -14.64         |
| 3B-2CP <sup>anti</sup>       | 10.88        | -14.79       |                              |                |                |                              |                |                |
| 2B-4CP <sup>anti</sup>       | 10.12        | -16.46       | 2,4-DBP <sup>anti</sup>      | 10.17          | -16.76         | 2,4-DCP <sup>anti</sup>      | 10.48          | -16.04         |
| 4B-2CP <sup>anti</sup>       | 10.44        | -16.26       |                              |                |                |                              |                |                |
| 2B-5CP <sup>anti</sup>       | 11.10        | -14.42       | 2,5-DBP <sup>anti</sup>      | 11.08          | -14.52         | 2,5-DCP <sup>anti</sup>      | 11.13          | -14.32         |
| 3B-6CP <sup>anti</sup>       | 11.10        | -14.40       |                              |                |                |                              |                |                |
| 2B-3,4DCP <sup>anti</sup>    | 10.21        | -16.15       | 2,3,4-TBP <sup>anti</sup>    | 10.37          | -16.36         | 2,3,4-TCP <sup>anti</sup>    | 10.37          | -15.73         |
| 3B-2,4DCP <sup>anti</sup>    | 10.57        | -16.19       |                              |                |                |                              |                |                |
| 4B-2,3DCP <sup>anti</sup>    | 10.49        | -15.80       |                              |                |                |                              |                |                |
| 2,3DB-4CP <sup>anti</sup>    | 10.01        | -16.29       |                              |                |                |                              |                |                |
| 2,4DB-3CP <sup>anti</sup>    | 10.31        | -15.83       |                              |                |                |                              |                |                |
| 3,4DB-2CP <sup>anti</sup>    | 10.39        | -15.92       |                              |                |                |                              |                |                |
| 2B-3,5DCP <sup>anti</sup>    | 11.20        | -13.87       | 2,3,5-TBP <sup>anti</sup>    | 11.27          | -14.08         | 2,3,5-TCP <sup>anti</sup>    | 11.16          | -13.87         |
| 3B-2,5DCP <sup>anti</sup>    | 11.45        | -13.99       |                              |                |                |                              |                |                |
| 3B-5,6DCP <sup>anti</sup>    | 11.49        | -13.95       |                              |                |                |                              |                |                |
| 2,3DB-5CP <sup>anti</sup>    | 11.08        | -14.02       |                              |                |                |                              |                |                |
| 2,5DB-3CP <sup>anti</sup>    | 11.17        | -13.94       |                              |                |                |                              |                |                |
| 3,5DB-2CP <sup>anti</sup>    | 11.32        | -13.96       |                              |                |                |                              |                |                |
| 2B-4,5DCP <sup>anti</sup>    | 10.43        | -15.75       | 2,4,5-TBP <sup>anti</sup>    | 10.63          | -15.89         | 2,4,5-TCP <sup>anti</sup>    | 10.76          | -15.19         |
| 3B-4,6DCP <sup>anti</sup>    | 10.62        | -15.75       |                              |                |                |                              |                |                |
| 4B-2,5DCP <sup>anti</sup>    | 10.84        | -15.37       |                              |                |                |                              |                |                |
| 2,4DB-5CP <sup>anti</sup>    | 10.72        | -15.38       |                              |                |                |                              |                |                |
| 2,5DB-4CP <sup>anti</sup>    | 10.45        | -15.65       |                              |                |                |                              |                |                |
| 3,4DB-6CP <sup>anti</sup>    | 10.77        | -15.38       |                              |                |                |                              |                |                |
| 2B-3,4,5TCP <sup>anti</sup>  | 10.62        | -15.39       | 2,3,4,5-TeBP <sup>anti</sup> | 10.46          | -15.54         | 2,3,4,5-TeCP <sup>anti</sup> | 10.85          | -13.94         |
| 3B-2,4,5TCP <sup>anti</sup>  | 10.88        | -15.20       |                              |                |                |                              |                |                |
| 3B-4,5,6TCP <sup>anti</sup>  | 11.28        | -15.12       |                              |                |                |                              |                |                |
| 4B-2,3,5TCP <sup>anti</sup>  | 11.04        | -14.81       |                              |                |                |                              |                |                |
| 2,3DB-4,5DCP <sup>anti</sup> | 10.63        | -15.25       |                              |                |                |                              |                |                |
| 2,4DB-3,5DCP <sup>anti</sup> | 10.81        | -14.77       |                              |                |                |                              |                |                |
| 2,5DB-3,4DCP <sup>anti</sup> | 10.57        | -14.69       |                              |                |                |                              |                |                |
| 3,4DB-2,5DCP <sup>anti</sup> | 11.66        | -14.16       |                              |                |                |                              |                |                |
| 3,4DB-5,6DCP <sup>anti</sup> | 10.81        | -14.97       |                              |                |                |                              |                |                |
| 3,5DB-2,4DCP <sup>anti</sup> | 10.77        | -15.22       |                              |                |                |                              |                |                |
| 2,3,4TB-5CP <sup>anti</sup>  | 10.67        | -14.56       |                              |                |                |                              |                |                |
| 2,3,5TB-4CP <sup>anti</sup>  | 10.63        | -14.75       |                              |                |                |                              |                |                |
| 2,4,5TB-3CP <sup>anti</sup>  | 10.74        | -14.74       |                              |                |                |                              |                |                |
| 3,4,5TB-2CP <sup>anti</sup>  | 10.98        | -14.87       |                              |                |                |                              |                |                |

$\Delta E_0$ , potential barrier (in kcal mol<sup>-1</sup>, 0 K, including ZPE correction), the relative energy of the transition state with respect to the total energy of the separated reactants. Calculated at the MPWB1K/6-311+G(3df,2p)//MPWB1K/6-31+G(d,p) level of theory.  $\Delta H_0$ , reaction heat (in kcal mol<sup>-1</sup>, 0 K, including ZPE correction), the relative energy of total energy of the separated products with respect to the total energy of the separated reactants. Calculated at the MPWB1K/6-311+G(3df,2p)//MPWB1K/6-31+G(d,p) level of theory.



**Table S4.** Arrhenius formulas for reaction of the anti-BCPs with H over the temperature range 600–1200 K ( $\text{cm}^3 \text{ molecule}^{-1} \text{ s}^{-1}$ )

| Reactions                                                                                    | Arrhenius formulas                             |
|----------------------------------------------------------------------------------------------|------------------------------------------------|
| $2\text{B-3CP}^{\text{anti}} + \text{H} \rightarrow 2\text{B-3CPR} + \text{H}_2$             | $k(T) = (9.7 \times 10^{-12}) \exp(-2966.0/T)$ |
| $3\text{B-2CP}^{\text{anti}} + \text{H} \rightarrow 3\text{B-2CPR} + \text{H}_2$             | $k(T) = (3.2 \times 10^{-12}) \exp(-3197.4/T)$ |
| $2\text{B-4CP}^{\text{anti}} + \text{H} \rightarrow 2\text{B-4CPR} + \text{H}_2$             | $k(T) = (7.9 \times 10^{-12}) \exp(-2951.6/T)$ |
| $4\text{B-2CP}^{\text{anti}} + \text{H} \rightarrow 4\text{B-2CPR} + \text{H}_2$             | $k(T) = (2.8 \times 10^{-12}) \exp(-3070.8/T)$ |
| $2\text{B-5CP}^{\text{anti}} + \text{H} \rightarrow 2\text{B-5CPR} + \text{H}_2$             | $k(T) = (7.6 \times 10^{-12}) \exp(-3450.2/T)$ |
| $3\text{B-6CP}^{\text{anti}} + \text{H} \rightarrow 3\text{B-6CPR} + \text{H}_2$             | $k(T) = (2.2 \times 10^{-13}) \exp(-4125.9/T)$ |
| $2\text{B-3,4DCP}^{\text{anti}} + \text{H} \rightarrow 2\text{B-3,4DCPR} + \text{H}_2$       | $k(T) = (1.0 \times 10^{-11}) \exp(-2996.7/T)$ |
| $3\text{B-2,4DCP}^{\text{anti}} + \text{H} \rightarrow 3\text{B-2,4DCPR} + \text{H}_2$       | $k(T) = (4.5 \times 10^{-12}) \exp(-2895.0/T)$ |
| $4\text{B-2,3DCP}^{\text{anti}} + \text{H} \rightarrow 4\text{B-2,3DCPR} + \text{H}_2$       | $k(T) = (8.1 \times 10^{-12}) \exp(-2686.1/T)$ |
| $2,3\text{DB-4CP}^{\text{anti}} + \text{H} \rightarrow 2,3\text{DB-4CPR} + \text{H}_2$       | $k(T) = (8.2 \times 10^{-12}) \exp(-2799.0/T)$ |
| $2,4\text{DB-3CP}^{\text{anti}} + \text{H} \rightarrow 2,4\text{DB-3CPR} + \text{H}_2$       | $k(T) = (1.0 \times 10^{-11}) \exp(-3041.5/T)$ |
| $3,4\text{DB-2CP}^{\text{anti}} + \text{H} \rightarrow 3,4\text{DB-2CPR} + \text{H}_2$       | $k(T) = (1.0 \times 10^{-11}) \exp(-2863.2/T)$ |
| $2\text{B-3,5DCP}^{\text{anti}} + \text{H} \rightarrow 2\text{B-3,5DCPR} + \text{H}_2$       | $k(T) = (6.9 \times 10^{-12}) \exp(-3373.4/T)$ |
| $3\text{B-2,5DCP}^{\text{anti}} + \text{H} \rightarrow 3\text{B-2,5DCPR} + \text{H}_2$       | $k(T) = (5.1 \times 10^{-12}) \exp(-3467.6/T)$ |
| $3\text{B-5,6DCP}^{\text{anti}} + \text{H} \rightarrow 3\text{B-5,6DCPR} + \text{H}_2$       | $k(T) = (5.9 \times 10^{-12}) \exp(-3185.5/T)$ |
| $2,3\text{DB-5CP}^{\text{anti}} + \text{H} \rightarrow 2,3\text{DB-5CPR} + \text{H}_2$       | $k(T) = (1.6 \times 10^{-12}) \exp(-2898.1/T)$ |
| $2,5\text{DB-3CP}^{\text{anti}} + \text{H} \rightarrow 2,5\text{DB-3CPR} + \text{H}_2$       | $k(T) = (8.0 \times 10^{-12}) \exp(-3139.8/T)$ |
| $3,5\text{DB-2CP}^{\text{anti}} + \text{H} \rightarrow 3,5\text{DB-2CPR} + \text{H}_2$       | $k(T) = (4.6 \times 10^{-12}) \exp(-3083.3/T)$ |
| $2\text{B-4,5DCP}^{\text{anti}} + \text{H} \rightarrow 2\text{B-4,5DCPR} + \text{H}_2$       | $k(T) = (4.0 \times 10^{-12}) \exp(-2929.7/T)$ |
| $3\text{B-4,6DCP}^{\text{anti}} + \text{H} \rightarrow 3\text{B-4,6DCPR} + \text{H}_2$       | $k(T) = (7.8 \times 10^{-12}) \exp(-3032.2/T)$ |
| $4\text{B-2,5DCP}^{\text{anti}} + \text{H} \rightarrow 4\text{B-2,5DCPR} + \text{H}_2$       | $k(T) = (6.9 \times 10^{-12}) \exp(-2925.5/T)$ |
| $2,4\text{DB-5CP}^{\text{anti}} + \text{H} \rightarrow 2,4\text{DB-5CPR} + \text{H}_2$       | $k(T) = (1.1 \times 10^{-13}) \exp(-2606.5/T)$ |
| $2,5\text{DB-4CP}^{\text{anti}} + \text{H} \rightarrow 2,5\text{DB-4CPR} + \text{H}_2$       | $k(T) = (1.9 \times 10^{-13}) \exp(-2766.3/T)$ |
| $3,4\text{DB-6CP}^{\text{anti}} + \text{H} \rightarrow 3,4\text{DB-6CPR} + \text{H}_2$       | $k(T) = (1.0 \times 10^{-11}) \exp(-3252.7/T)$ |
| $2\text{B-3,4,5TCP}^{\text{anti}} + \text{H} \rightarrow 2\text{B-3,4,5TCPR} + \text{H}_2$   | $k(T) = (1.1 \times 10^{-11}) \exp(-3127.1/T)$ |
| $3\text{B-2,4,5TCP}^{\text{anti}} + \text{H} \rightarrow 3\text{B-2,4,5TCPR} + \text{H}_2$   | $k(T) = (7.1 \times 10^{-12}) \exp(-2744.0/T)$ |
| $3\text{B-4,5,6TCP}^{\text{anti}} + \text{H} \rightarrow 3\text{B-4,5,6TCPR} + \text{H}_2$   | $k(T) = (4.8 \times 10^{-12}) \exp(-3056.3/T)$ |
| $4\text{B-2,3,5TCP}^{\text{anti}} + \text{H} \rightarrow 4\text{B-2,3,5TCPR} + \text{H}_2$   | $k(T) = (8.1 \times 10^{-12}) \exp(-3122.5/T)$ |
| $2,3\text{DB-4,5DCP}^{\text{anti}} + \text{H} \rightarrow 2,3\text{DB-4,5DCPR} + \text{H}_2$ | $k(T) = (9.4 \times 10^{-12}) \exp(-2987.4/T)$ |
| $2,4\text{DB-3,5DCP}^{\text{anti}} + \text{H} \rightarrow 2,4\text{DB-3,5DCPR} + \text{H}_2$ | $k(T) = (9.0 \times 10^{-12}) \exp(-3029.0/T)$ |
| $2,5\text{DB-3,4DCP}^{\text{anti}} + \text{H} \rightarrow 2,5\text{DB-3,4DCPR} + \text{H}_2$ | $k(T) = (1.0 \times 10^{-11}) \exp(-3024.2/T)$ |
| $3,4\text{DB-2,5DCP}^{\text{anti}} + \text{H} \rightarrow 3,4\text{DB-2,5DCPR} + \text{H}_2$ | $k(T) = (6.1 \times 10^{-12}) \exp(-3496.0/T)$ |
| $3,4\text{DB-5,6DCP}^{\text{anti}} + \text{H} \rightarrow 3,4\text{DB-5,6DCPR} + \text{H}_2$ | $k(T) = (7.8 \times 10^{-12}) \exp(-4221.8/T)$ |
| $3,5\text{DB-2,4DCP}^{\text{anti}} + \text{H} \rightarrow 3,5\text{DB-2,4DCPR} + \text{H}_2$ | $k(T) = (1.6 \times 10^{-12}) \exp(-2708.2/T)$ |
| $2,3,4\text{TB-5CP}^{\text{anti}} + \text{H} \rightarrow 2,3,4\text{TB-5CPR} + \text{H}_2$   | $k(T) = (1.7 \times 10^{-11}) \exp(-3567.3/T)$ |
| $2,3,5\text{TB-4CP}^{\text{anti}} + \text{H} \rightarrow 2,3,5\text{TB-4CPR} + \text{H}_2$   | $k(T) = (4.9 \times 10^{-12}) \exp(-3206.5/T)$ |
| $2,4,5\text{TB-3CP}^{\text{anti}} + \text{H} \rightarrow 2,4,5\text{TB-3CPR} + \text{H}_2$   | $k(T) = (9.0 \times 10^{-12}) \exp(-2777.5/T)$ |
| $3,4,5\text{TB-2CP}^{\text{anti}} + \text{H} \rightarrow 3,4,5\text{TB-2CPR} + \text{H}_2$   | $k(T) = (7.3 \times 10^{-12}) \exp(-3370.3/T)$ |

**Table S5.** CVT/SCT rate constants for the reactions of the bromochlorophenols (BCPs)with H over the temperature range of 600–1200 K ( $\text{cm}^3 \text{ molecule}^{-1} \text{ s}^{-1}$ ).

| T(K) | CVT/SCT Rate Constants |                       |                       |                       |
|------|------------------------|-----------------------|-----------------------|-----------------------|
|      | 2B-3CP + H             | 3B-2CP + H            | 2B-4CP + H            | 4B-2CP + H            |
| 600  | $2.2 \times 10^{-16}$  | $8.5 \times 10^{-17}$ | $3.8 \times 10^{-16}$ | $1.4 \times 10^{-16}$ |
| 700  | $1.2 \times 10^{-15}$  | $4.5 \times 10^{-16}$ | $1.8 \times 10^{-15}$ | $7.0 \times 10^{-16}$ |
| 800  | $4.4 \times 10^{-15}$  | $1.7 \times 10^{-15}$ | $6.1 \times 10^{-15}$ | $2.5 \times 10^{-15}$ |
| 900  | $1.3 \times 10^{-14}$  | $4.9 \times 10^{-15}$ | $1.7 \times 10^{-14}$ | $6.9 \times 10^{-15}$ |
| 1000 | $3.2 \times 10^{-14}$  | $1.2 \times 10^{-14}$ | $3.8 \times 10^{-14}$ | $1.6 \times 10^{-14}$ |
| 1100 | $6.9 \times 10^{-14}$  | $2.5 \times 10^{-14}$ | $7.7 \times 10^{-14}$ | $3.3 \times 10^{-14}$ |
| 1200 | $1.3 \times 10^{-13}$  | $4.7 \times 10^{-14}$ | $1.4 \times 10^{-13}$ | $6.0 \times 10^{-14}$ |
|      | 2B-5CP + H             | 3B-6CP + H            | 2B-6CP + H            | 3B-4CP + H            |
| 600  | $1.1 \times 10^{-16}$  | $2.0 \times 10^{-17}$ | $2.3 \times 10^{-16}$ | $8.2 \times 10^{-16}$ |
| 700  | $6.9 \times 10^{-16}$  | $9.9 \times 10^{-17}$ | $9.7 \times 10^{-16}$ | $3.5 \times 10^{-15}$ |
| 800  | $2.8 \times 10^{-15}$  | $3.4 \times 10^{-16}$ | $3.1 \times 10^{-15}$ | $1.1 \times 10^{-14}$ |
| 900  | $8.4 \times 10^{-15}$  | $9.3 \times 10^{-16}$ | $8.2 \times 10^{-15}$ | $2.7 \times 10^{-14}$ |
| 1000 | $2.1 \times 10^{-14}$  | $2.1 \times 10^{-15}$ | $1.8 \times 10^{-14}$ | $5.7 \times 10^{-14}$ |
| 1100 | $4.6 \times 10^{-14}$  | $4.3 \times 10^{-15}$ | $3.6 \times 10^{-14}$ | $2.6 \times 10^{-13}$ |
| 1200 | $8.8 \times 10^{-14}$  | $7.9 \times 10^{-15}$ | $6.4 \times 10^{-14}$ | $4.5 \times 10^{-13}$ |
|      | 4B-3CP + H             | 3B-5CP + H            | 2B-3,4DCP + H         | 3B-2,4DCP + H         |
| 600  | $2.4 \times 10^{-15}$  | $7.3 \times 10^{-16}$ | $3.2 \times 10^{-16}$ | $2.7 \times 10^{-16}$ |
| 700  | $9.4 \times 10^{-15}$  | $2.4 \times 10^{-15}$ | $1.6 \times 10^{-15}$ | $1.3 \times 10^{-15}$ |
| 800  | $2.8 \times 10^{-14}$  | $7.0 \times 10^{-15}$ | $5.8 \times 10^{-15}$ | $4.3 \times 10^{-15}$ |
| 900  | $6.6 \times 10^{-14}$  | $1.8 \times 10^{-14}$ | $1.6 \times 10^{-14}$ | $1.2 \times 10^{-14}$ |
| 1000 | $1.4 \times 10^{-13}$  | $3.8 \times 10^{-14}$ | $3.8 \times 10^{-14}$ | $2.7 \times 10^{-14}$ |
| 1100 | $2.6 \times 10^{-13}$  | $7.4 \times 10^{-14}$ | $7.8 \times 10^{-14}$ | $5.4 \times 10^{-14}$ |
| 1200 | $4.6 \times 10^{-13}$  | $1.3 \times 10^{-13}$ | $1.5 \times 10^{-13}$ | $9.8 \times 10^{-14}$ |
|      | 4B-2,3DCP + H          | 2,3DB-4CP + H         | 2,4DB-3CP + H         | 3,4DB-2CP + H         |
| 600  | $7.2 \times 10^{-16}$  | $4.1 \times 10^{-16}$ | $3.4 \times 10^{-16}$ | $6.0 \times 10^{-16}$ |
| 700  | $3.1 \times 10^{-15}$  | $1.9 \times 10^{-15}$ | $1.7 \times 10^{-15}$ | $2.8 \times 10^{-15}$ |
| 800  | $10.0 \times 10^{-15}$ | $6.3 \times 10^{-15}$ | $6.2 \times 10^{-15}$ | $9.4 \times 10^{-15}$ |
| 900  | $2.6 \times 10^{-14}$  | $1.7 \times 10^{-14}$ | $1.8 \times 10^{-14}$ | $2.5 \times 10^{-14}$ |
| 1000 | $5.7 \times 10^{-14}$  | $3.8 \times 10^{-14}$ | $4.1 \times 10^{-14}$ | $5.8 \times 10^{-14}$ |
| 1100 | $1.1 \times 10^{-13}$  | $7.7 \times 10^{-14}$ | $8.5 \times 10^{-14}$ | $1.2 \times 10^{-13}$ |
| 1200 | $2.0 \times 10^{-13}$  | $1.4 \times 10^{-13}$ | $1.6 \times 10^{-13}$ | $2.2 \times 10^{-13}$ |

Table S5 Cont.

| T(K) | CVT/SCT Rate Constants |                       |                       |                       |
|------|------------------------|-----------------------|-----------------------|-----------------------|
|      | 2B-3,5DCP + H          | 3B-2,5DCP + H         | 3B-5,6DCP + H         | 2,3DB-5CP + H         |
| 600  | $9.5 \times 10^{-17}$  | $7.8 \times 10^{-17}$ | $1.7 \times 10^{-16}$ | $7.2 \times 10^{-17}$ |
| 700  | $5.8 \times 10^{-16}$  | $4.9 \times 10^{-16}$ | $8.8 \times 10^{-16}$ | $3.4 \times 10^{-16}$ |
| 800  | $2.4 \times 10^{-15}$  | $2.0 \times 10^{-15}$ | $3.2 \times 10^{-15}$ | $1.2 \times 10^{-15}$ |
| 900  | $7.4 \times 10^{-15}$  | $6.3 \times 10^{-15}$ | $9.2 \times 10^{-15}$ | $3.1 \times 10^{-15}$ |
| 1000 | $1.9 \times 10^{-14}$  | $1.6 \times 10^{-14}$ | $2.2 \times 10^{-14}$ | $7.3 \times 10^{-15}$ |
| 1100 | $4.1 \times 10^{-14}$  | $3.5 \times 10^{-14}$ | $4.6 \times 10^{-14}$ | $1.5 \times 10^{-14}$ |
| 1200 | $8.1 \times 10^{-14}$  | $6.9 \times 10^{-14}$ | $8.7 \times 10^{-14}$ | $2.7 \times 10^{-14}$ |
|      | 2,5DB-3CP + H          | 3,5DB-2CP + H         | 2B-3,6DCP + H         | 2B-5,6DCP + H         |
| 600  | $2.2 \times 10^{-16}$  | $8.6 \times 10^{-17}$ | $4.9 \times 10^{-16}$ | $4.6 \times 10^{-16}$ |
| 700  | $1.1 \times 10^{-15}$  | $5.2 \times 10^{-16}$ | $2.2 \times 10^{-15}$ | $2.2 \times 10^{-15}$ |
| 800  | $4.1 \times 10^{-15}$  | $2.1 \times 10^{-15}$ | $7.5 \times 10^{-15}$ | $7.7 \times 10^{-15}$ |
| 900  | $1.2 \times 10^{-14}$  | $6.5 \times 10^{-15}$ | $2.0 \times 10^{-14}$ | $2.1 \times 10^{-14}$ |
| 1000 | $2.9 \times 10^{-14}$  | $1.7 \times 10^{-14}$ | $4.6 \times 10^{-14}$ | $4.8 \times 10^{-14}$ |
| 1100 | $6.0 \times 10^{-14}$  | $3.6 \times 10^{-14}$ | $9.3 \times 10^{-14}$ | $9.9 \times 10^{-14}$ |
| 1200 | $1.1 \times 10^{-13}$  | $7.2 \times 10^{-14}$ | $1.7 \times 10^{-13}$ | $1.8 \times 10^{-13}$ |
|      | 3B-2,6DCP + H          | 2,3DB-6CP + H         | 2,5DB-6CP + H         | 2,6DB-3CP + H         |
| 600  | $6.0 \times 10^{-16}$  | $6.1 \times 10^{-16}$ | $7.4 \times 10^{-16}$ | $4.6 \times 10^{-16}$ |
| 700  | $2.9 \times 10^{-15}$  | $2.9 \times 10^{-15}$ | $3.5 \times 10^{-15}$ | $2.2 \times 10^{-15}$ |
| 800  | $9.7 \times 10^{-15}$  | $9.9 \times 10^{-15}$ | $1.2 \times 10^{-14}$ | $7.5 \times 10^{-15}$ |
| 900  | $2.6 \times 10^{-14}$  | $2.7 \times 10^{-14}$ | $3.3 \times 10^{-14}$ | $2.0 \times 10^{-14}$ |
| 1000 | $5.9 \times 10^{-14}$  | $6.2 \times 10^{-14}$ | $7.4 \times 10^{-14}$ | $4.7 \times 10^{-14}$ |
| 1100 | $1.2 \times 10^{-13}$  | $1.3 \times 10^{-13}$ | $1.5 \times 10^{-13}$ | $9.5 \times 10^{-14}$ |
| 1200 | $2.2 \times 10^{-13}$  | $2.3 \times 10^{-13}$ | $2.8 \times 10^{-13}$ | $1.8 \times 10^{-13}$ |
|      | 2B-4,5DCP + H          | 3B-4,6DCP + H         | 4B-2,5DCP + H         | 2,4DB-5CP + H         |
| 600  | $2.1 \times 10^{-16}$  | $4.1 \times 10^{-16}$ | $4.7 \times 10^{-16}$ | $1.4 \times 10^{-16}$ |
| 700  | $9.8 \times 10^{-16}$  | $1.9 \times 10^{-15}$ | $2.2 \times 10^{-15}$ | $5.4 \times 10^{-16}$ |
| 800  | $3.3 \times 10^{-15}$  | $6.5 \times 10^{-15}$ | $7.1 \times 10^{-15}$ | $1.6 \times 10^{-15}$ |
| 900  | $8.9 \times 10^{-15}$  | $1.8 \times 10^{-14}$ | $1.9 \times 10^{-14}$ | $4.0 \times 10^{-15}$ |
| 1000 | $2.0 \times 10^{-14}$  | $4.0 \times 10^{-14}$ | $4.3 \times 10^{-14}$ | $8.5 \times 10^{-15}$ |
| 1100 | $4.1 \times 10^{-14}$  | $8.1 \times 10^{-14}$ | $8.5 \times 10^{-14}$ | $1.6 \times 10^{-14}$ |
| 1200 | $7.4 \times 10^{-14}$  | $1.5 \times 10^{-13}$ | $1.5 \times 10^{-13}$ | $2.9 \times 10^{-14}$ |
|      | 2,5DB-4CP + H          | 3,4DB-6CP + H         | 2B-4,6DCP + H         | 4B-2,6DCP + H         |
| 600  | $1.3 \times 10^{-17}$  | $3.4 \times 10^{-16}$ | $7.9 \times 10^{-16}$ | $8.6 \times 10^{-16}$ |
| 700  | $6.2 \times 10^{-17}$  | $1.8 \times 10^{-15}$ | $3.4 \times 10^{-15}$ | $3.7 \times 10^{-15}$ |
| 800  | $2.2 \times 10^{-16}$  | $6.6 \times 10^{-15}$ | $1.1 \times 10^{-14}$ | $1.2 \times 10^{-14}$ |
| 900  | $5.9 \times 10^{-16}$  | $1.9 \times 10^{-14}$ | $2.7 \times 10^{-14}$ | $3.0 \times 10^{-14}$ |
| 1000 | $1.4 \times 10^{-15}$  | $4.4 \times 10^{-14}$ | $5.8 \times 10^{-14}$ | $6.4 \times 10^{-14}$ |
| 1100 | $2.8 \times 10^{-15}$  | $9.2 \times 10^{-14}$ | $1.1 \times 10^{-13}$ | $1.3 \times 10^{-13}$ |
| 1200 | $5.1 \times 10^{-15}$  | $1.7 \times 10^{-13}$ | $2.0 \times 10^{-13}$ | $2.2 \times 10^{-13}$ |

**Table S5 Cont.**

| T(K) | CVT/SCT Rate Constants |                       |                       |                       |
|------|------------------------|-----------------------|-----------------------|-----------------------|
|      | 2,4DB-6CP + H          | 2,6DB-4CP + H         | 3B-4,5DCP + H         | 4B-3,5DCP + H         |
| 600  | $4.1 \times 10^{-17}$  | $3.4 \times 10^{-17}$ | $1.4 \times 10^{-15}$ | $1.7 \times 10^{-15}$ |
| 700  | $1.7 \times 10^{-16}$  | $1.7 \times 10^{-16}$ | $6.1 \times 10^{-15}$ | $6.9 \times 10^{-15}$ |
| 800  | $5.5 \times 10^{-16}$  | $5.7 \times 10^{-16}$ | $2.0 \times 10^{-14}$ | $2.1 \times 10^{-14}$ |
| 900  | $1.4 \times 10^{-15}$  | $1.6 \times 10^{-15}$ | $5.2 \times 10^{-14}$ | $5.3 \times 10^{-14}$ |
| 1000 | $3.1 \times 10^{-15}$  | $3.6 \times 10^{-15}$ | $1.2 \times 10^{-13}$ | $1.2 \times 10^{-13}$ |
| 1100 | $6.0 \times 10^{-15}$  | $7.3 \times 10^{-15}$ | $2.3 \times 10^{-13}$ | $2.2 \times 10^{-13}$ |
| 1200 | $1.1 \times 10^{-14}$  | $1.4 \times 10^{-14}$ | $4.1 \times 10^{-13}$ | $4.0 \times 10^{-13}$ |
|      | 3,4DB-5CP + H          | 3,5DB-4CP + H         | 2B-3,4,5TCP + H       | 3B-2,4,5TCP + H       |
| 600  | $1.2 \times 10^{-15}$  | $1.2 \times 10^{-15}$ | $2.4 \times 10^{-16}$ | $5.9 \times 10^{-16}$ |
| 700  | $5.4 \times 10^{-15}$  | $4.8 \times 10^{-15}$ | $1.3 \times 10^{-15}$ | $2.6 \times 10^{-15}$ |
| 800  | $1.8 \times 10^{-14}$  | $1.5 \times 10^{-14}$ | $4.8 \times 10^{-15}$ | $8.2 \times 10^{-15}$ |
| 900  | $4.7 \times 10^{-14}$  | $3.8 \times 10^{-14}$ | $1.4 \times 10^{-14}$ | $2.1 \times 10^{-14}$ |
| 1000 | $1.1 \times 10^{-13}$  | $8.2 \times 10^{-14}$ | $3.3 \times 10^{-14}$ | $4.7 \times 10^{-14}$ |
| 1100 | $2.1 \times 10^{-13}$  | $1.6 \times 10^{-13}$ | $7.0 \times 10^{-14}$ | $9.4 \times 10^{-14}$ |
| 1200 | $3.8 \times 10^{-13}$  | $2.8 \times 10^{-13}$ | $1.3 \times 10^{-13}$ | $1.7 \times 10^{-13}$ |
|      | 3B-4,5,6TCTP + H       | 4B-2,3,5TCP + H       | 2,3DB-4,5DCP + H      | 2,4DB-3,5DCP + H      |
| 600  | $2.5 \times 10^{-16}$  | $3.0 \times 10^{-16}$ | $3.2 \times 10^{-16}$ | $3.1 \times 10^{-16}$ |
| 700  | $1.2 \times 10^{-15}$  | $1.6 \times 10^{-15}$ | $1.6 \times 10^{-15}$ | $1.6 \times 10^{-15}$ |
| 800  | $4.3 \times 10^{-15}$  | $5.6 \times 10^{-15}$ | $5.7 \times 10^{-15}$ | $5.6 \times 10^{-15}$ |
| 900  | $1.2 \times 10^{-14}$  | $1.6 \times 10^{-14}$ | $1.6 \times 10^{-14}$ | $1.6 \times 10^{-14}$ |
| 1000 | $2.7 \times 10^{-14}$  | $3.7 \times 10^{-14}$ | $3.7 \times 10^{-14}$ | $3.7 \times 10^{-14}$ |
| 1100 | $5.6 \times 10^{-14}$  | $7.6 \times 10^{-14}$ | $7.7 \times 10^{-14}$ | $7.7 \times 10^{-14}$ |
| 1200 | $1.0 \times 10^{-13}$  | $1.4 \times 10^{-13}$ | $1.4 \times 10^{-13}$ | $1.4 \times 10^{-13}$ |
|      | 2,5DB-3,4DCP + H       | 3,4DB-2,5DCP + H      | 3,4DB-5,6DCP + H      | 3,5DB-2,4DCP + H      |
| 600  | $3.0 \times 10^{-16}$  | $1.6 \times 10^{-16}$ | $2.9 \times 10^{-16}$ | $1.4 \times 10^{-16}$ |
| 700  | $1.6 \times 10^{-15}$  | $9.2 \times 10^{-16}$ | $1.5 \times 10^{-15}$ | $5.9 \times 10^{-16}$ |
| 800  | $5.6 \times 10^{-15}$  | $3.6 \times 10^{-15}$ | $5.6 \times 10^{-15}$ | $1.9 \times 10^{-15}$ |
| 900  | $1.6 \times 10^{-14}$  | $1.1 \times 10^{-14}$ | $1.6 \times 10^{-14}$ | $4.7 \times 10^{-15}$ |
| 1000 | $3.7 \times 10^{-14}$  | $2.7 \times 10^{-14}$ | $3.9 \times 10^{-14}$ | $1.0 \times 10^{-14}$ |
| 1100 | $7.6 \times 10^{-14}$  | $5.8 \times 10^{-14}$ | $8.0 \times 10^{-14}$ | $2.0 \times 10^{-14}$ |
| 1200 | $1.4 \times 10^{-13}$  | $1.1 \times 10^{-13}$ | $1.5 \times 10^{-13}$ | $3.7 \times 10^{-14}$ |
|      | 2,3,4TB-5CP + H        | 2,3,5TB-4CP + H       | 2,4,5TB-3CP + H       | 3,4,5TB-2CP + H       |
| 600  | $1.7 \times 10^{-16}$  | $1.5 \times 10^{-16}$ | $5.5 \times 10^{-16}$ | $1.3 \times 10^{-16}$ |
| 700  | $9.9 \times 10^{-16}$  | $8.5 \times 10^{-16}$ | $2.5 \times 10^{-15}$ | $7.6 \times 10^{-16}$ |
| 800  | $4.0 \times 10^{-15}$  | $3.3 \times 10^{-15}$ | $8.2 \times 10^{-15}$ | $3.0 \times 10^{-15}$ |
| 900  | $1.2 \times 10^{-14}$  | $9.7 \times 10^{-15}$ | $2.2 \times 10^{-14}$ | $8.9 \times 10^{-15}$ |
| 1000 | $3.0 \times 10^{-14}$  | $2.4 \times 10^{-14}$ | $4.8 \times 10^{-14}$ | $2.2 \times 10^{-14}$ |
| 1100 | $6.5 \times 10^{-14}$  | $5.0 \times 10^{-14}$ | $9.6 \times 10^{-14}$ | $4.7 \times 10^{-14}$ |
| 1200 | $1.3 \times 10^{-13}$  | $9.6 \times 10^{-14}$ | $1.7 \times 10^{-13}$ | $9.0 \times 10^{-14}$ |

Table S5 Cont.

| T(K) | CVT/SCT Rate Constants |                       |                       |                       |
|------|------------------------|-----------------------|-----------------------|-----------------------|
|      | 2B-3,4,6TCP + H        | 2B-4,5,6TCP + H       | 3B-2,4,6TCP + H       | 4B-2,3,6TCP + H       |
| 600  | $7.5 \times 10^{-16}$  | $4.6 \times 10^{-16}$ | $9.0 \times 10^{-16}$ | $6.7 \times 10^{-16}$ |
| 700  | $3.6 \times 10^{-15}$  | $2.4 \times 10^{-15}$ | $4.0 \times 10^{-15}$ | $3.1 \times 10^{-15}$ |
| 800  | $1.2 \times 10^{-14}$  | $8.6 \times 10^{-15}$ | $1.3 \times 10^{-14}$ | $1.0 \times 10^{-14}$ |
| 900  | $3.3 \times 10^{-14}$  | $2.4 \times 10^{-14}$ | $3.3 \times 10^{-14}$ | $2.7 \times 10^{-14}$ |
| 1000 | $7.5 \times 10^{-13}$  | $5.7 \times 10^{-14}$ | $7.3 \times 10^{-14}$ | $6.2 \times 10^{-14}$ |
| 1100 | $1.5 \times 10^{-13}$  | $1.2 \times 10^{-13}$ | $1.4 \times 10^{-13}$ | $1.2 \times 10^{-13}$ |
| 1200 | $2.8 \times 10^{-13}$  | $2.2 \times 10^{-13}$ | $2.6 \times 10^{-13}$ | $2.3 \times 10^{-13}$ |
|      | 2,3DB-4,6DCP + H       | 2,4DB-3,6DCP + H      | 2,4DB-5,6DCP + H      | 2,5DB-4,6DCP + H      |
| 600  | $9.0 \times 10^{-16}$  | $7.7 \times 10^{-16}$ | $6.4 \times 10^{-17}$ | $1.6 \times 10^{-16}$ |
| 700  | $4.0 \times 10^{-15}$  | $2.9 \times 10^{-15}$ | $2.9 \times 10^{-16}$ | $7.9 \times 10^{-16}$ |
| 800  | $1.3 \times 10^{-14}$  | $8.3 \times 10^{-15}$ | $9.7 \times 10^{-16}$ | $2.7 \times 10^{-15}$ |
| 900  | $3.4 \times 10^{-14}$  | $2.0 \times 10^{-14}$ | $2.5 \times 10^{-15}$ | $7.4 \times 10^{-15}$ |
| 1000 | $7.7 \times 10^{-14}$  | $4.1 \times 10^{-14}$ | $5.7 \times 10^{-15}$ | $1.7 \times 10^{-14}$ |
| 1100 | $1.5 \times 10^{-13}$  | $7.8 \times 10^{-14}$ | $1.1 \times 10^{-14}$ | $3.5 \times 10^{-14}$ |
| 1200 | $2.8 \times 10^{-13}$  | $1.4 \times 10^{-13}$ | $2.0 \times 10^{-14}$ | $6.3 \times 10^{-14}$ |
|      | 2,6DB-3,4DCP + H       | 3,4DB-2,6DCP + H      | 2,3,4TB-6CP + H       | 2,3,6TB-4CP + H       |
| 600  | $7.5 \times 10^{-16}$  | $7.0 \times 10^{-16}$ | $5.1 \times 10^{-16}$ | $9.1 \times 10^{-17}$ |
| 700  | $4.0 \times 10^{-15}$  | $3.2 \times 10^{-15}$ | $2.6 \times 10^{-15}$ | $4.4 \times 10^{-16}$ |
| 800  | $1.4 \times 10^{-14}$  | $1.1 \times 10^{-14}$ | $9.4 \times 10^{-15}$ | $1.5 \times 10^{-15}$ |
| 900  | $4.0 \times 10^{-14}$  | $2.8 \times 10^{-14}$ | $2.6 \times 10^{-14}$ | $4.1 \times 10^{-15}$ |
| 1000 | $9.5 \times 10^{-14}$  | $6.4 \times 10^{-14}$ | $6.2 \times 10^{-14}$ | $9.6 \times 10^{-15}$ |
| 1100 | $2.0 \times 10^{-13}$  | $1.3 \times 10^{-13}$ | $1.3 \times 10^{-13}$ | $2.0 \times 10^{-14}$ |
| 1200 | $3.7 \times 10^{-13}$  | $2.3 \times 10^{-13}$ | $2.4 \times 10^{-13}$ | $3.6 \times 10^{-14}$ |
|      | 2,4,5TB-6CP + H        | 2,4,6TB-3CP + H       | 2B-3,5,6TCP + H       | 3B-2,5,6TCP + H       |
| 600  | $7.9 \times 10^{-16}$  | $4.0 \times 10^{-16}$ | $3.0 \times 10^{-16}$ | $4.0 \times 10^{-17}$ |
| 700  | $3.5 \times 10^{-15}$  | $2.1 \times 10^{-15}$ | $1.6 \times 10^{-15}$ | $2.0 \times 10^{-16}$ |
| 800  | $1.2 \times 10^{-14}$  | $7.9 \times 10^{-15}$ | $5.8 \times 10^{-15}$ | $7.0 \times 10^{-16}$ |
| 900  | $3.0 \times 10^{-14}$  | $2.3 \times 10^{-14}$ | $1.7 \times 10^{-14}$ | $2.0 \times 10^{-15}$ |
| 1000 | $6.8 \times 10^{-14}$  | $5.4 \times 10^{-14}$ | $4.0 \times 10^{-14}$ | $4.6 \times 10^{-15}$ |
| 1100 | $1.4 \times 10^{-13}$  | $1.1 \times 10^{-13}$ | $8.4 \times 10^{-14}$ | $9.3 \times 10^{-15}$ |
| 1200 | $2.5 \times 10^{-13}$  | $2.1 \times 10^{-13}$ | $1.6 \times 10^{-13}$ | $1.7 \times 10^{-14}$ |
|      | 2,3DB-5,6DCP + H       | 2,5DB-3,6DCP + H      | 2,6DB-3,5DCP + H      | 3,5DB-2,6DCP + H      |
| 600  | $4.4 \times 10^{-16}$  | $3.1 \times 10^{-16}$ | $8.7 \times 10^{-16}$ | $3.8 \times 10^{-16}$ |
| 700  | $2.2 \times 10^{-15}$  | $1.6 \times 10^{-15}$ | $4.9 \times 10^{-15}$ | $1.9 \times 10^{-15}$ |
| 800  | $8.0 \times 10^{-15}$  | $6.0 \times 10^{-15}$ | $1.9 \times 10^{-14}$ | $6.4 \times 10^{-15}$ |
| 900  | $2.2 \times 10^{-14}$  | $1.7 \times 10^{-14}$ | $5.7 \times 10^{-14}$ | $1.8 \times 10^{-14}$ |
| 1000 | $5.3 \times 10^{-14}$  | $4.2 \times 10^{-14}$ | $1.4 \times 10^{-13}$ | $4.1 \times 10^{-14}$ |
| 1100 | $1.1 \times 10^{-13}$  | $8.7 \times 10^{-14}$ | $3.0 \times 10^{-13}$ | $8.3 \times 10^{-14}$ |
| 1200 | $2.0 \times 10^{-13}$  | $1.6 \times 10^{-13}$ | $5.8 \times 10^{-13}$ | $1.5 \times 10^{-13}$ |

**Table S5 Cont.**

| T(K) | CVT/SCT Rate Constants |                       |                       |                       |
|------|------------------------|-----------------------|-----------------------|-----------------------|
|      | 2,3,5TB-6CP + H        | 2,3,6TB-5CP + H       | 2B-3,4,5,6TeCP + H    | 3B-2,4,5,6TeCP + H    |
| 600  | $6.2 \times 10^{-17}$  | $9.1 \times 10^{-16}$ | $4.6 \times 10^{-17}$ | $2.5 \times 10^{-17}$ |
| 700  | $3.4 \times 10^{-16}$  | $4.6 \times 10^{-15}$ | $2.3 \times 10^{-16}$ | $1.5 \times 10^{-16}$ |
| 800  | $1.2 \times 10^{-15}$  | $1.7 \times 10^{-14}$ | $7.9 \times 10^{-16}$ | $5.7 \times 10^{-16}$ |
| 900  | $3.6 \times 10^{-15}$  | $4.7 \times 10^{-14}$ | $2.2 \times 10^{-15}$ | $1.7 \times 10^{-15}$ |
| 1000 | $8.5 \times 10^{-15}$  | $1.1 \times 10^{-13}$ | $5.1 \times 10^{-15}$ | $4.3 \times 10^{-15}$ |
| 1100 | $1.8 \times 10^{-14}$  | $2.3 \times 10^{-13}$ | $1.0 \times 10^{-14}$ | $9.4 \times 10^{-15}$ |
| 1200 | $3.3 \times 10^{-14}$  | $4.3 \times 10^{-13}$ | $1.9 \times 10^{-14}$ | $1.8 \times 10^{-14}$ |
|      | 4B-2,3,5,6TeCP + H     | 2,3DB-4,5,6TCP + H    | 2,4DB-3,5,6TCP + H    | 2,5DB-3,4,6TCP + H    |
| 600  | $4.8 \times 10^{-16}$  | $8.4 \times 10^{-16}$ | $6.1 \times 10^{-16}$ | $1.1 \times 10^{-16}$ |
| 700  | $2.2 \times 10^{-15}$  | $3.8 \times 10^{-15}$ | $2.9 \times 10^{-15}$ | $5.5 \times 10^{-16}$ |
| 800  | $7.5 \times 10^{-15}$  | $1.3 \times 10^{-14}$ | $1.0 \times 10^{-14}$ | $1.9 \times 10^{-15}$ |
| 900  | $2.0 \times 10^{-14}$  | $3.3 \times 10^{-14}$ | $2.7 \times 10^{-14}$ | $5.0 \times 10^{-15}$ |
| 1000 | $4.6 \times 10^{-14}$  | $7.5 \times 10^{-14}$ | $6.3 \times 10^{-14}$ | $1.1 \times 10^{-14}$ |
| 1100 | $9.2 \times 10^{-14}$  | $1.5 \times 10^{-13}$ | $1.3 \times 10^{-13}$ | $2.3 \times 10^{-14}$ |
| 1200 | $1.7 \times 10^{-13}$  | $2.7 \times 10^{-13}$ | $2.4 \times 10^{-13}$ | $4.1 \times 10^{-14}$ |
|      | 2,6DB-3,4,5TCP + H     | 3,4DB-2,5,6TCP + H    | 3,5DB-2,4,6TCP + H    | 2,3,4TB-5,6DCP + H    |
| 600  | $8.7 \times 10^{-16}$  | $8.5 \times 10^{-17}$ | $5.0 \times 10^{-16}$ | $5.9 \times 10^{-16}$ |
| 700  | $4.7 \times 10^{-15}$  | $4.5 \times 10^{-16}$ | $2.3 \times 10^{-15}$ | $2.7 \times 10^{-15}$ |
| 800  | $1.7 \times 10^{-14}$  | $1.7 \times 10^{-15}$ | $7.7 \times 10^{-15}$ | $8.9 \times 10^{-15}$ |
| 900  | $5.0 \times 10^{-14}$  | $4.9 \times 10^{-15}$ | $2.0 \times 10^{-14}$ | $2.4 \times 10^{-14}$ |
| 1000 | $1.2 \times 10^{-13}$  | $1.2 \times 10^{-14}$ | $4.6 \times 10^{-14}$ | $5.5 \times 10^{-14}$ |
| 1100 | $2.5 \times 10^{-13}$  | $2.5 \times 10^{-14}$ | $9.2 \times 10^{-14}$ | $1.1 \times 10^{-13}$ |
| 1200 | $4.8 \times 10^{-13}$  | $4.7 \times 10^{-14}$ | $1.7 \times 10^{-13}$ | $2.1 \times 10^{-13}$ |
|      | 2,3,5TB-4,6DCP + H     | 2,3,6TB-4,5DCP + H    | 2,4,5TB-3,6DCP + H    | 2,4,6TB-3,5DCP + H    |
| 600  | $4.8 \times 10^{-16}$  | $8.6 \times 10^{-17}$ | $4.8 \times 10^{-16}$ | $6.5 \times 10^{-17}$ |
| 700  | $2.2 \times 10^{-15}$  | $4.8 \times 10^{-16}$ | $2.3 \times 10^{-15}$ | $3.7 \times 10^{-16}$ |
| 800  | $7.4 \times 10^{-15}$  | $1.8 \times 10^{-15}$ | $7.9 \times 10^{-15}$ | $1.4 \times 10^{-15}$ |
| 900  | $2.0 \times 10^{-14}$  | $5.3 \times 10^{-15}$ | $2.1 \times 10^{-14}$ | $4.3 \times 10^{-15}$ |
| 1000 | $4.5 \times 10^{-14}$  | $1.3 \times 10^{-14}$ | $4.9 \times 10^{-14}$ | $1.1 \times 10^{-14}$ |
| 1100 | $9.1 \times 10^{-14}$  | $2.8 \times 10^{-14}$ | $9.9 \times 10^{-14}$ | $2.3 \times 10^{-14}$ |
| 1200 | $1.7 \times 10^{-13}$  | $5.2 \times 10^{-14}$ | $1.8 \times 10^{-13}$ | $4.5 \times 10^{-14}$ |
|      | 3,4,5TB-2,6DCP + H     | 2,3,4,5TeB-6CP + H    | 2,3,4,6TeB-5CP + H    | 2,3,5,6TeB-4CP + H    |
| 600  | $4.5 \times 10^{-16}$  | $1.5 \times 10^{-16}$ | $4.8 \times 10^{-16}$ | $7.7 \times 10^{-16}$ |
| 700  | $2.2 \times 10^{-15}$  | $8.1 \times 10^{-16}$ | $2.4 \times 10^{-15}$ | $4.2 \times 10^{-15}$ |
| 800  | $7.6 \times 10^{-15}$  | $3.0 \times 10^{-15}$ | $8.7 \times 10^{-15}$ | $1.6 \times 10^{-14}$ |
| 900  | $2.1 \times 10^{-14}$  | $8.4 \times 10^{-15}$ | $2.4 \times 10^{-14}$ | $4.7 \times 10^{-14}$ |
| 1000 | $4.9 \times 10^{-14}$  | $2.0 \times 10^{-14}$ | $5.7 \times 10^{-14}$ | $1.1 \times 10^{-13}$ |
| 1100 | $9.9 \times 10^{-14}$  | $4.1 \times 10^{-14}$ | $1.2 \times 10^{-13}$ | $2.4 \times 10^{-13}$ |
| 1200 | $1.8 \times 10^{-13}$  | $7.6 \times 10^{-14}$ | $2.2 \times 10^{-13}$ | $4.6 \times 10^{-13}$ |

**Table S6.** CVT/SCT rate constants for the reactions of the anti-BCPs with H over the temperature range of 600–1200 K ( $\text{cm}^3 \text{ molecule}^{-1} \text{ s}^{-1}$ ).

| T(K) | CVT/SCT Rate Constants        |                               |                               |                               |
|------|-------------------------------|-------------------------------|-------------------------------|-------------------------------|
|      | 2B-3CP <sup>anti</sup> + H    | 3B-2CP <sup>anti</sup> + H    | 2B-4CP <sup>anti</sup> + H    | 4B-2CP <sup>anti</sup> + H    |
| 600  | $7.4 \times 10^{-15}$         | $1.4 \times 10^{-15}$         | $6.1 \times 10^{-15}$         | $1.6 \times 10^{-15}$         |
| 700  | $2.3 \times 10^{-14}$         | $4.7 \times 10^{-15}$         | $1.9 \times 10^{-14}$         | $5.2 \times 10^{-15}$         |
| 800  | $5.6 \times 10^{-14}$         | $1.3 \times 10^{-14}$         | $4.7 \times 10^{-14}$         | $1.4 \times 10^{-14}$         |
| 900  | $1.2 \times 10^{-13}$         | $2.9 \times 10^{-14}$         | $9.9 \times 10^{-14}$         | $3.0 \times 10^{-14}$         |
| 1000 | $2.3 \times 10^{-13}$         | $5.6 \times 10^{-14}$         | $1.9 \times 10^{-13}$         | $5.7 \times 10^{-14}$         |
| 1100 | $3.9 \times 10^{-13}$         | $1.0 \times 10^{-13}$         | $3.2 \times 10^{-13}$         | $9.8 \times 10^{-14}$         |
| 1200 | $6.4 \times 10^{-13}$         | $1.7 \times 10^{-13}$         | $5.2 \times 10^{-13}$         | $1.6 \times 10^{-13}$         |
|      | 2B-5CP <sup>anti</sup> + H    | 3B-6CP <sup>anti</sup> + H    | 2B-3,4DCP <sup>anti</sup> + H | 3B-2,4DCP <sup>anti</sup> + H |
| 600  | $1.7 \times 10^{-15}$         | $9.2 \times 10^{-18}$         | $6.9 \times 10^{-15}$         | $4.0 \times 10^{-15}$         |
| 700  | $6.8 \times 10^{-15}$         | $5.0 \times 10^{-17}$         | $2.2 \times 10^{-14}$         | $1.2 \times 10^{-14}$         |
| 800  | $2.0 \times 10^{-14}$         | $1.8 \times 10^{-16}$         | $5.6 \times 10^{-14}$         | $3.0 \times 10^{-14}$         |
| 900  | $4.7 \times 10^{-14}$         | $5.2 \times 10^{-16}$         | $1.2 \times 10^{-13}$         | $6.2 \times 10^{-14}$         |
| 1000 | $9.7 \times 10^{-14}$         | $1.2 \times 10^{-15}$         | $2.3 \times 10^{-13}$         | $1.2 \times 10^{-13}$         |
| 1100 | $1.8 \times 10^{-13}$         | $2.5 \times 10^{-15}$         | $3.9 \times 10^{-13}$         | $2.0 \times 10^{-13}$         |
| 1200 | $3.0 \times 10^{-13}$         | $4.5 \times 10^{-15}$         | $6.2 \times 10^{-13}$         | $3.1 \times 10^{-13}$         |
|      | 4B-2,3DCP <sup>anti</sup> + H | 2,3DB-4CP <sup>anti</sup> + H | 2,4DB-3CP <sup>anti</sup> + H | 3,4DB-2CP <sup>anti</sup> + H |
| 600  | $1.2 \times 10^{-14}$         | $9.2 \times 10^{-15}$         | $6.4 \times 10^{-15}$         | $1.0 \times 10^{-14}$         |
| 700  | $3.4 \times 10^{-14}$         | $2.7 \times 10^{-14}$         | $2.1 \times 10^{-14}$         | $3.0 \times 10^{-14}$         |
| 800  | $7.6 \times 10^{-14}$         | $6.3 \times 10^{-14}$         | $5.3 \times 10^{-14}$         | $7.2 \times 10^{-14}$         |
| 900  | $1.5 \times 10^{-13}$         | $1.3 \times 10^{-13}$         | $1.2 \times 10^{-13}$         | $1.5 \times 10^{-13}$         |
| 1000 | $2.7 \times 10^{-13}$         | $2.3 \times 10^{-13}$         | $2.2 \times 10^{-13}$         | $2.8 \times 10^{-13}$         |
| 1100 | $4.4 \times 10^{-13}$         | $3.9 \times 10^{-13}$         | $3.8 \times 10^{-13}$         | $4.7 \times 10^{-13}$         |
| 1200 | $6.9 \times 10^{-13}$         | $6.2 \times 10^{-13}$         | $6.2 \times 10^{-13}$         | $7.4 \times 10^{-13}$         |
|      | 2B-3,5DCP <sup>anti</sup> + H | 3B-2,5DCP <sup>anti</sup> + H | 3B-5,6DCP <sup>anti</sup> + H | 2,3DB-5CP <sup>anti</sup> + H |
| 600  | $1.9 \times 10^{-15}$         | $1.1 \times 10^{-15}$         | $2.6 \times 10^{-15}$         | $1.5 \times 10^{-15}$         |
| 700  | $7.1 \times 10^{-15}$         | $4.4 \times 10^{-15}$         | $8.9 \times 10^{-15}$         | $4.4 \times 10^{-15}$         |
| 800  | $2.0 \times 10^{-14}$         | $1.3 \times 10^{-14}$         | $2.4 \times 10^{-14}$         | $1.1 \times 10^{-14}$         |
| 900  | $4.7 \times 10^{-14}$         | $3.1 \times 10^{-14}$         | $5.3 \times 10^{-14}$         | $2.2 \times 10^{-14}$         |
| 1000 | $1.9 \times 10^{-14}$         | $6.4 \times 10^{-14}$         | $1.1 \times 10^{-13}$         | $4.2 \times 10^{-14}$         |
| 1100 | $1.8 \times 10^{-13}$         | $1.2 \times 10^{-13}$         | $1.9 \times 10^{-13}$         | $7.1 \times 10^{-14}$         |
| 1200 | $2.9 \times 10^{-13}$         | $2.0 \times 10^{-13}$         | $3.1 \times 10^{-13}$         | $1.1 \times 10^{-13}$         |
|      | 2,5DB-3CP <sup>anti</sup> + H | 3,5DB-2CP <sup>anti</sup> + H | 2B-4,5DCP <sup>anti</sup> + H | 3B-4,6DCP <sup>anti</sup> + H |
| 600  | $3.9 \times 10^{-15}$         | $2.6 \times 10^{-15}$         | $3.3 \times 10^{-15}$         | $5.0 \times 10^{-15}$         |
| 700  | $1.3 \times 10^{-14}$         | $8.5 \times 10^{-15}$         | $1.0 \times 10^{-14}$         | $1.6 \times 10^{-14}$         |
| 800  | $3.5 \times 10^{-14}$         | $2.2 \times 10^{-14}$         | $2.5 \times 10^{-14}$         | $4.1 \times 10^{-14}$         |
| 900  | $7.7 \times 10^{-14}$         | $4.8 \times 10^{-14}$         | $5.2 \times 10^{-14}$         | $8.8 \times 10^{-14}$         |
| 1000 | $1.5 \times 10^{-13}$         | $9.3 \times 10^{-14}$         | $9.7 \times 10^{-14}$         | $1.7 \times 10^{-13}$         |
| 1100 | $2.7 \times 10^{-13}$         | $1.6 \times 10^{-13}$         | $1.7 \times 10^{-13}$         | $2.9 \times 10^{-13}$         |
| 1200 | $4.4 \times 10^{-13}$         | $2.7 \times 10^{-13}$         | $2.7 \times 10^{-13}$         | $4.8 \times 10^{-13}$         |

Table S6 Cont.

| T(K) | CVT/SCT Rate Constants           |                                  |                                  |                                  |
|------|----------------------------------|----------------------------------|----------------------------------|----------------------------------|
|      | 4B-2,5DCP <sup>anti</sup> + H    | 2,4DB-5CP <sup>anti</sup> + H    | 2,5DB-4CP <sup>anti</sup> + H    | 3,4DB-6CP <sup>anti</sup> + H    |
| 600  | $5.7 \times 10^{-15}$            | $2.1 \times 10^{-15}$            | $2.2 \times 10^{-16}$            | $3.8 \times 10^{-15}$            |
| 700  | $1.8 \times 10^{-14}$            | $5.5 \times 10^{-15}$            | $6.6 \times 10^{-16}$            | $1.4 \times 10^{-14}$            |
| 800  | $4.3 \times 10^{-14}$            | $1.2 \times 10^{-14}$            | $1.5 \times 10^{-15}$            | $3.8 \times 10^{-14}$            |
| 900  | $9.1 \times 10^{-14}$            | $2.4 \times 10^{-14}$            | $3.1 \times 10^{-15}$            | $8.6 \times 10^{-14}$            |
| 1000 | $1.7 \times 10^{-13}$            | $4.1 \times 10^{-14}$            | $5.6 \times 10^{-15}$            | $1.7 \times 10^{-13}$            |
| 1100 | $2.9 \times 10^{-13}$            | $6.8 \times 10^{-14}$            | $9.2 \times 10^{-15}$            | $3.0 \times 10^{-13}$            |
| 1200 | $4.7 \times 10^{-13}$            | $1.1 \times 10^{-13}$            | $1.4 \times 10^{-14}$            | $5.0 \times 10^{-13}$            |
|      | 2B-3,4,5TCP <sup>anti</sup> + H  | 3B-2,4,5TCP <sup>anti</sup> + H  | 3B-4,5,6TCTP <sup>anti</sup> + H | 4B-2,3,5TCP <sup>anti</sup> + H  |
| 600  | $5.5 \times 10^{-15}$            | $9.2 \times 10^{-15}$            | $2.9 \times 10^{-15}$            | $4.1 \times 10^{-15}$            |
| 700  | $1.9 \times 10^{-14}$            | $2.6 \times 10^{-14}$            | $9.4 \times 10^{-15}$            | $1.4 \times 10^{-14}$            |
| 800  | $4.9 \times 10^{-14}$            | $6.0 \times 10^{-14}$            | $2.4 \times 10^{-14}$            | $3.6 \times 10^{-14}$            |
| 900  | $1.1 \times 10^{-13}$            | $1.2 \times 10^{-13}$            | $5.2 \times 10^{-14}$            | $8.0 \times 10^{-14}$            |
| 1000 | $2.1 \times 10^{-13}$            | $2.2 \times 10^{-13}$            | $1.0 \times 10^{-13}$            | $1.6 \times 10^{-13}$            |
| 1100 | $3.7 \times 10^{-13}$            | $3.6 \times 10^{-13}$            | $1.8 \times 10^{-13}$            | $2.7 \times 10^{-13}$            |
| 1200 | $6.1 \times 10^{-13}$            | $5.7 \times 10^{-13}$            | $2.8 \times 10^{-13}$            | $4.5 \times 10^{-13}$            |
|      | 2,3DB-4,5DCP <sup>anti</sup> + H | 2,4DB-3,5DCP <sup>anti</sup> + H | 2,5DB-3,4DCP <sup>anti</sup> + H | 3,4DB-2,5DCP <sup>anti</sup> + H |
| 600  | $6.7 \times 10^{-15}$            | $5.8 \times 10^{-15}$            | $6.7 \times 10^{-15}$            | $1.2 \times 10^{-15}$            |
| 700  | $2.1 \times 10^{-14}$            | $1.9 \times 10^{-14}$            | $2.2 \times 10^{-14}$            | $5.0 \times 10^{-15}$            |
| 800  | $5.3 \times 10^{-14}$            | $4.7 \times 10^{-14}$            | $5.5 \times 10^{-14}$            | $1.5 \times 10^{-14}$            |
| 900  | $1.1 \times 10^{-13}$            | $1.0 \times 10^{-13}$            | $1.2 \times 10^{-13}$            | $3.6 \times 10^{-14}$            |
| 1000 | $2.1 \times 10^{-13}$            | $1.9 \times 10^{-13}$            | $2.3 \times 10^{-13}$            | $7.4 \times 10^{-14}$            |
| 1100 | $3.7 \times 10^{-13}$            | $3.4 \times 10^{-13}$            | $3.9 \times 10^{-13}$            | $1.4 \times 10^{-13}$            |
| 1200 | $5.9 \times 10^{-13}$            | $5.5 \times 10^{-13}$            | $6.3 \times 10^{-13}$            | $2.3 \times 10^{-13}$            |
|      | 3,4DB-5,6DCP <sup>anti</sup> + H | 3,5DB-2,4DCP <sup>anti</sup> + H | 2,3,4TB-5CP <sup>anti</sup> + H  | 2,3,5TB-4CP <sup>anti</sup> + H  |
| 600  | $2.0 \times 10^{-16}$            | $2.3 \times 10^{-15}$            | $2.8 \times 10^{-15}$            | $2.0 \times 10^{-15}$            |
| 700  | $2.1 \times 10^{-15}$            | $6.3 \times 10^{-15}$            | $1.2 \times 10^{-14}$            | $7.1 \times 10^{-15}$            |
| 800  | $6.0 \times 10^{-15}$            | $1.4 \times 10^{-14}$            | $3.5 \times 10^{-14}$            | $1.9 \times 10^{-14}$            |
| 900  | $1.8 \times 10^{-14}$            | $2.9 \times 10^{-14}$            | $8.6 \times 10^{-14}$            | $4.3 \times 10^{-14}$            |
| 1000 | $2.5 \times 10^{-14}$            | $5.2 \times 10^{-14}$            | $1.8 \times 10^{-13}$            | $8.5 \times 10^{-14}$            |
| 1100 | $7.7 \times 10^{-14}$            | $8.6 \times 10^{-14}$            | $3.4 \times 10^{-13}$            | $1.5 \times 10^{-13}$            |
| 1200 | $1.6 \times 10^{-13}$            | $1.4 \times 10^{-13}$            | $5.9 \times 10^{-13}$            | $2.5 \times 10^{-13}$            |
|      | 2,4,5TB-3CP <sup>anti</sup> + H  | 3,4,5TB-2CP <sup>anti</sup> + H  |                                  |                                  |
| 600  | $1.1 \times 10^{-14}$            | $2.0 \times 10^{-15}$            |                                  |                                  |
| 700  | $3.1 \times 10^{-14}$            | $7.6 \times 10^{-15}$            |                                  |                                  |
| 800  | $7.2 \times 10^{-14}$            | $2.2 \times 10^{-14}$            |                                  |                                  |
| 900  | $1.5 \times 10^{-13}$            | $5.1 \times 10^{-14}$            |                                  |                                  |
| 1000 | $2.7 \times 10^{-13}$            | $1.0 \times 10^{-13}$            |                                  |                                  |
| 1100 | $4.4 \times 10^{-13}$            | $1.9 \times 10^{-13}$            |                                  |                                  |
| 1200 | $7.0 \times 10^{-13}$            | $3.2 \times 10^{-13}$            |                                  |                                  |



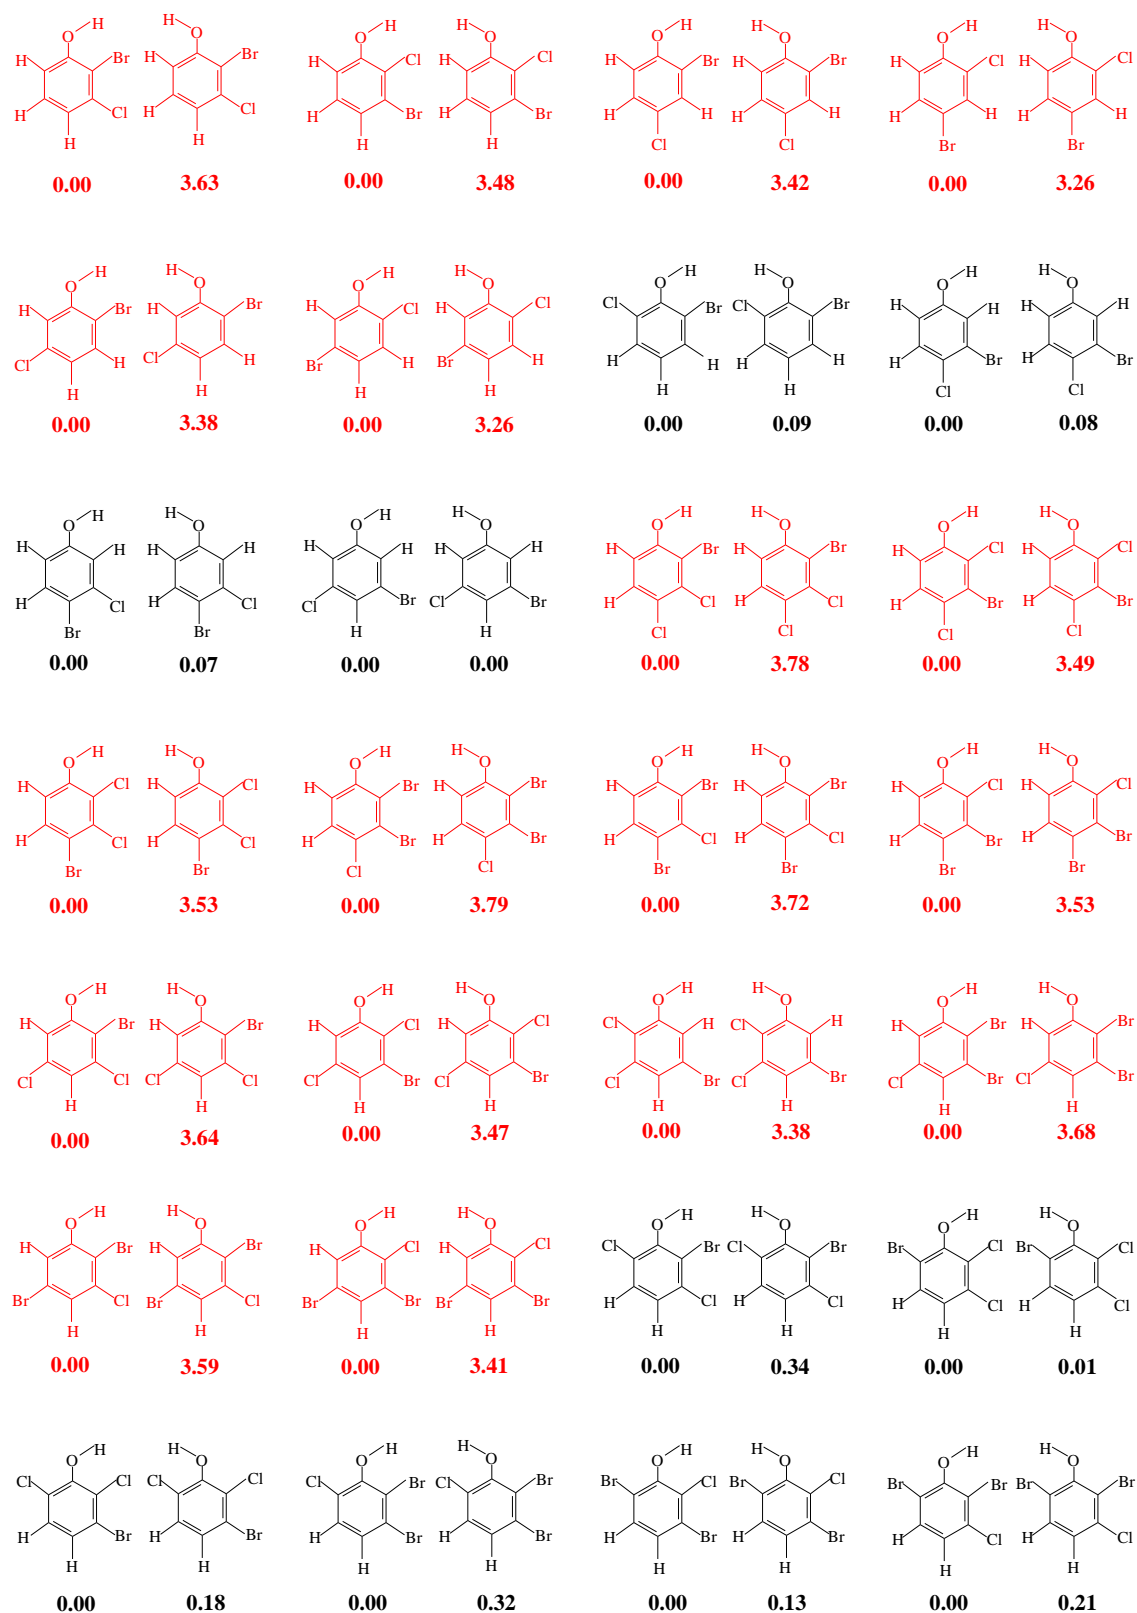

Figure S1

Figure S1 Cont.

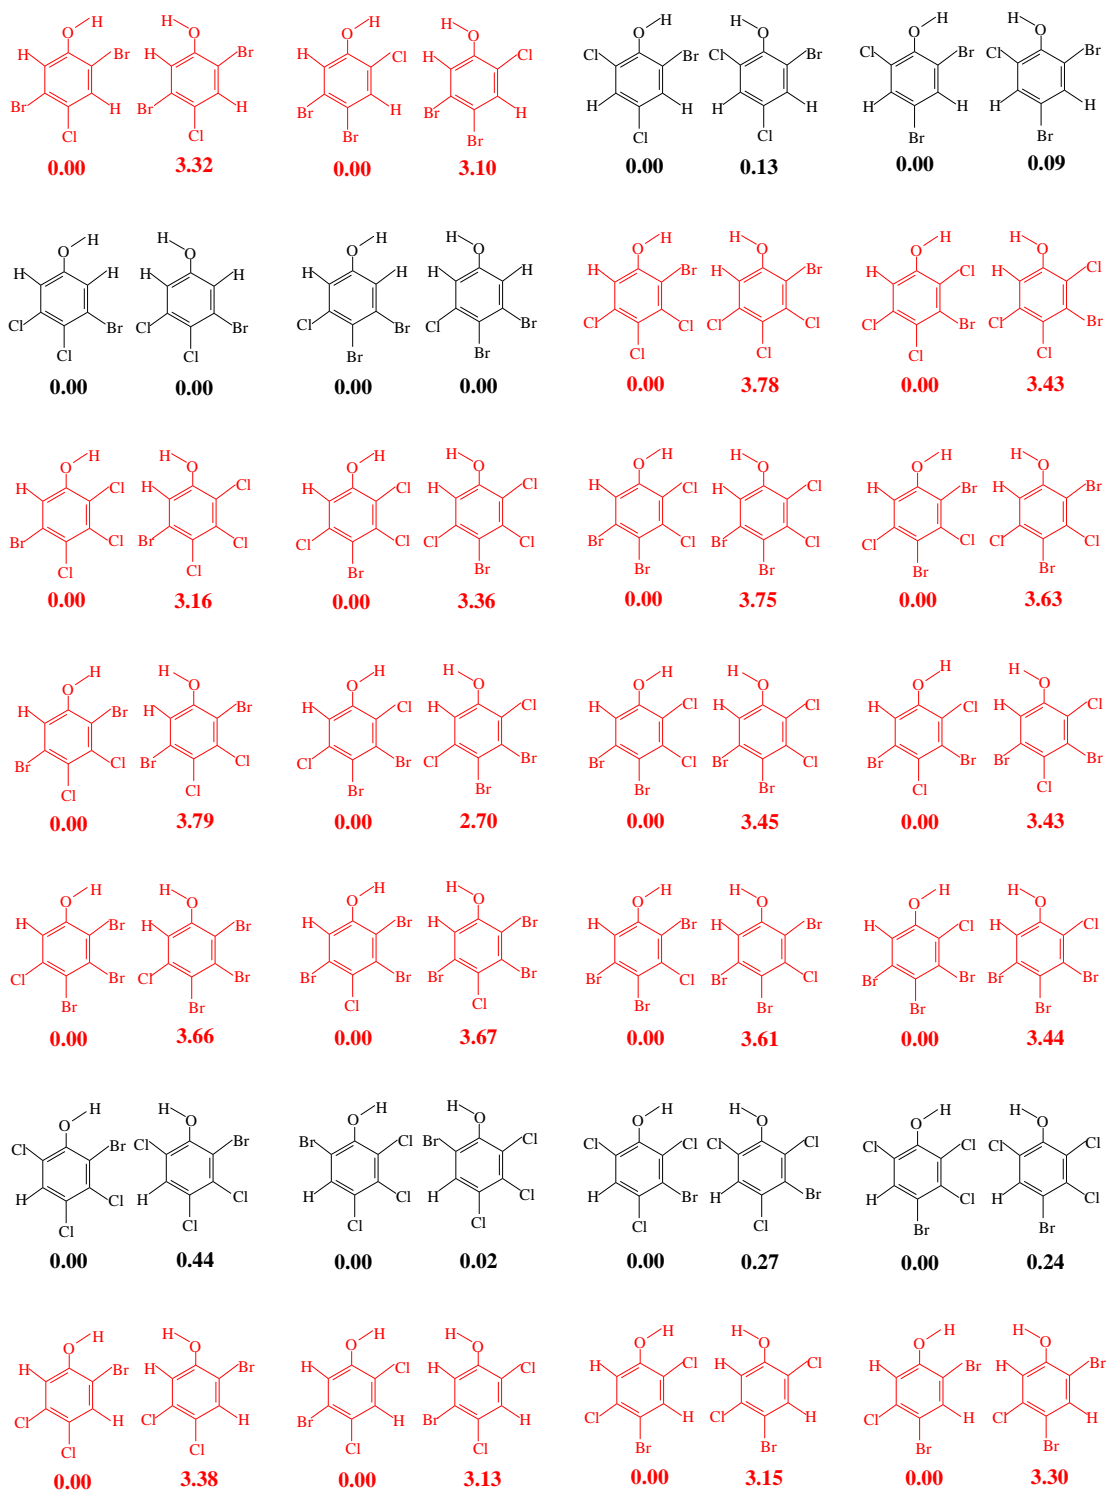

Figure S1 *Cont.*

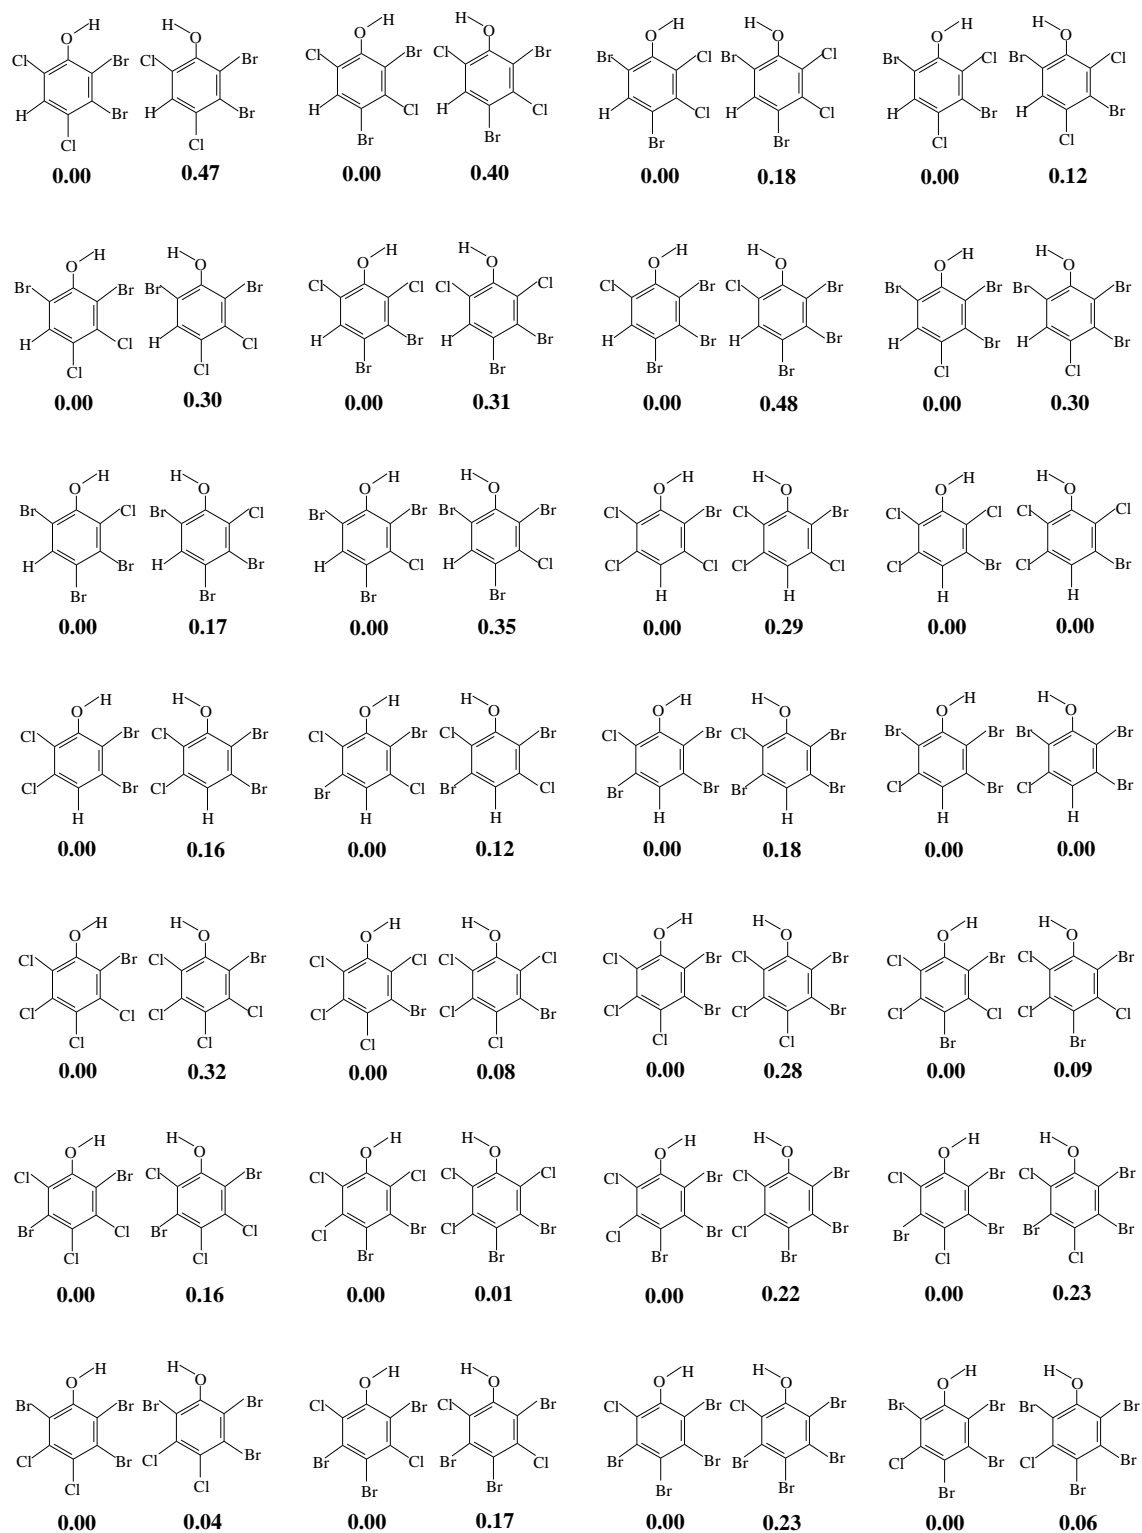

Figure S1

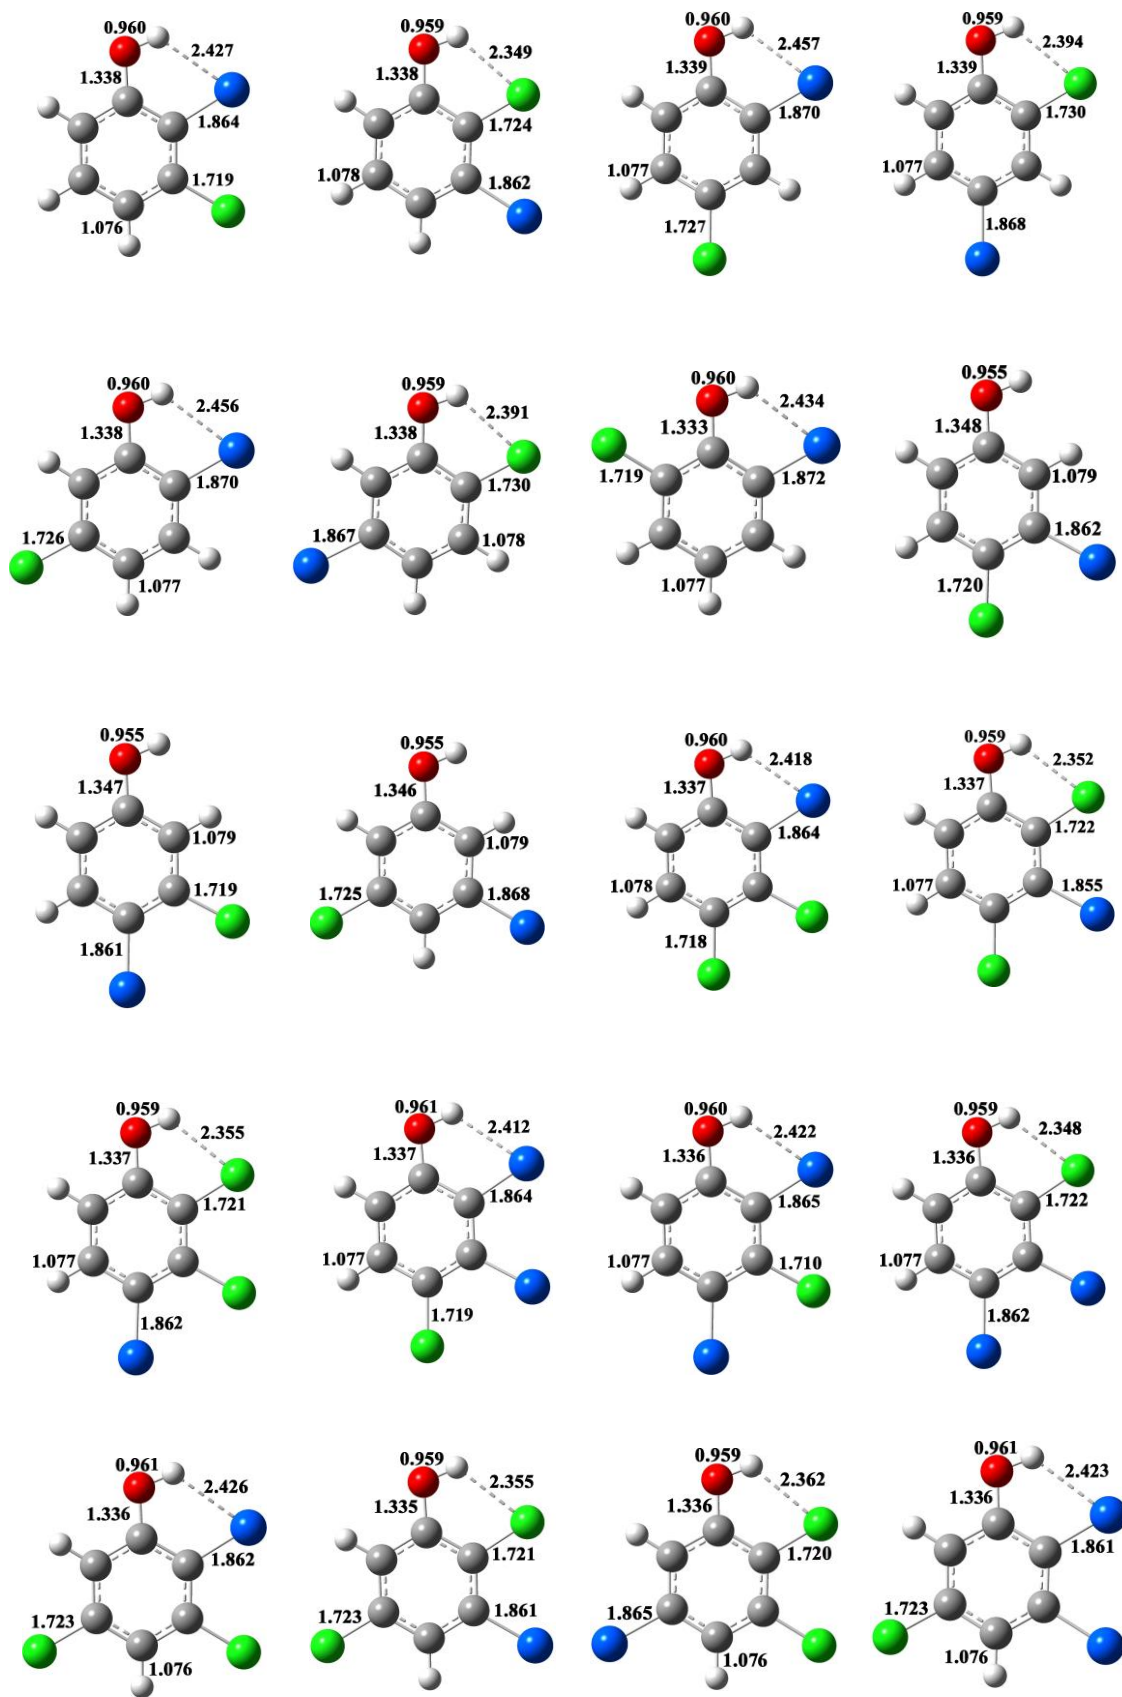

Figure S2

Figure S2 *Cont.*

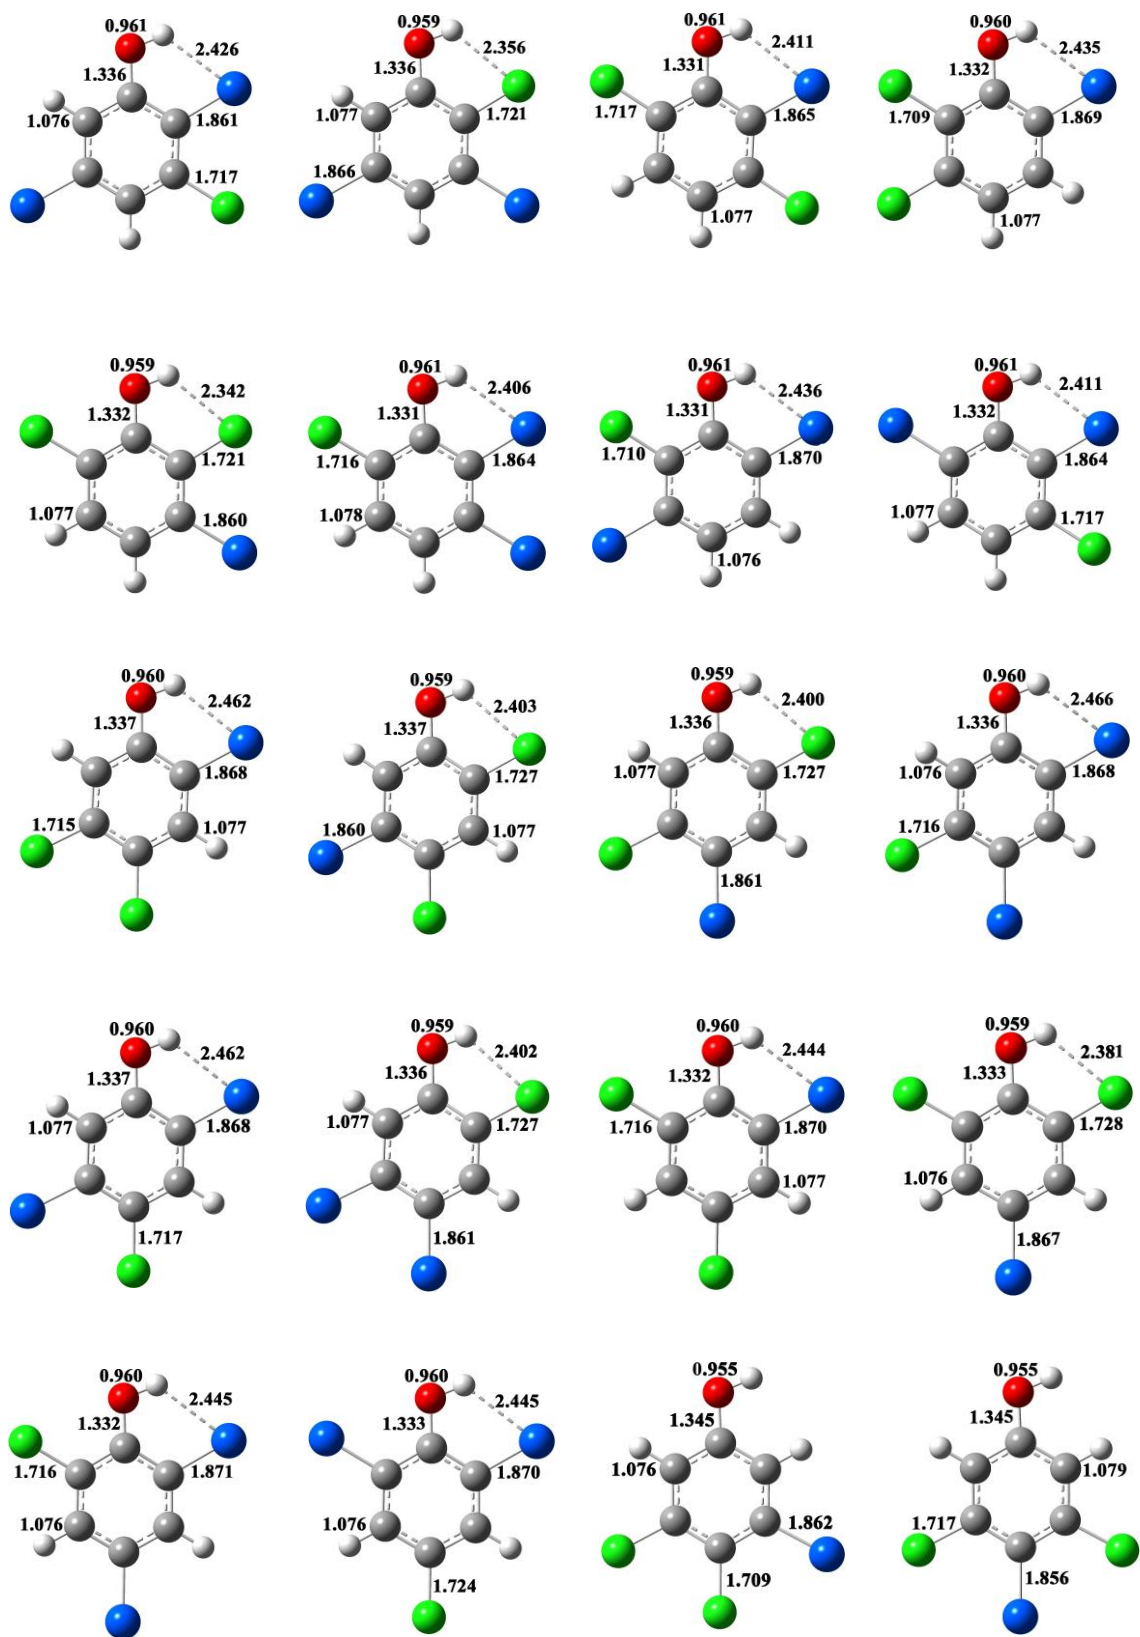

Figure S2 Cont.

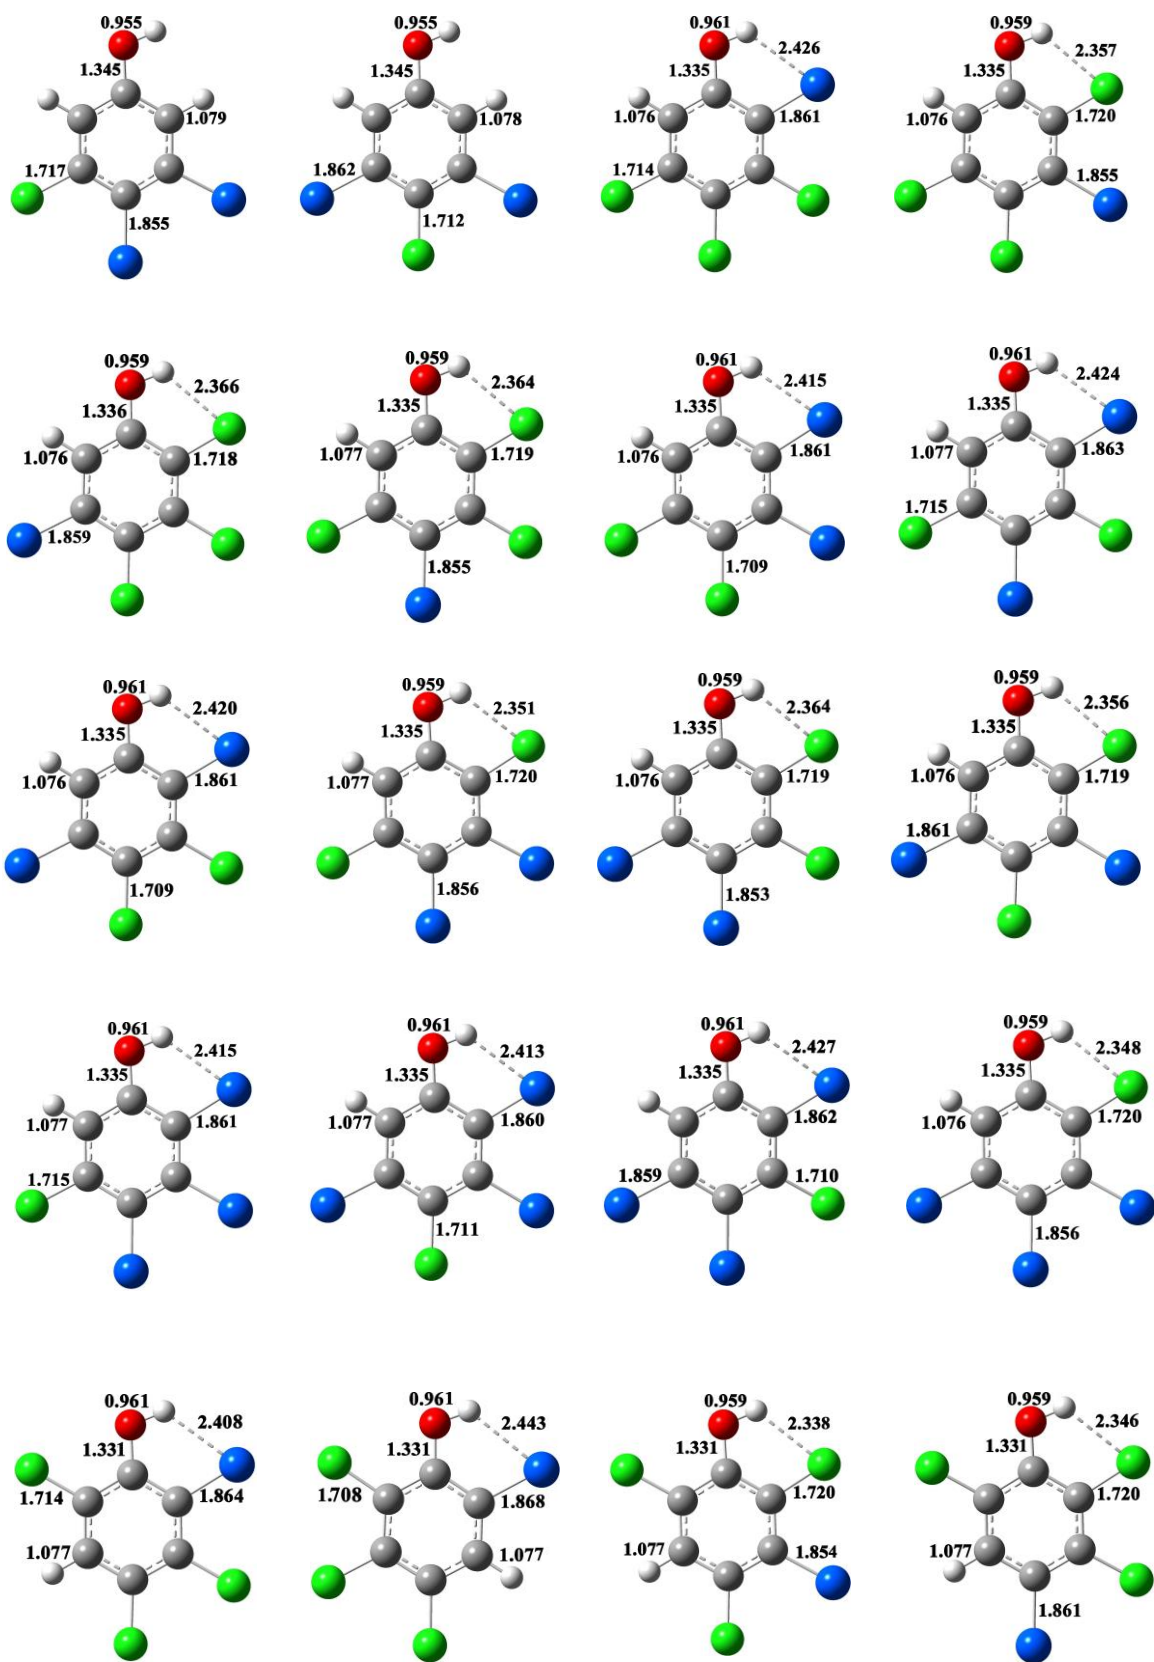

Figure S2 Cont.

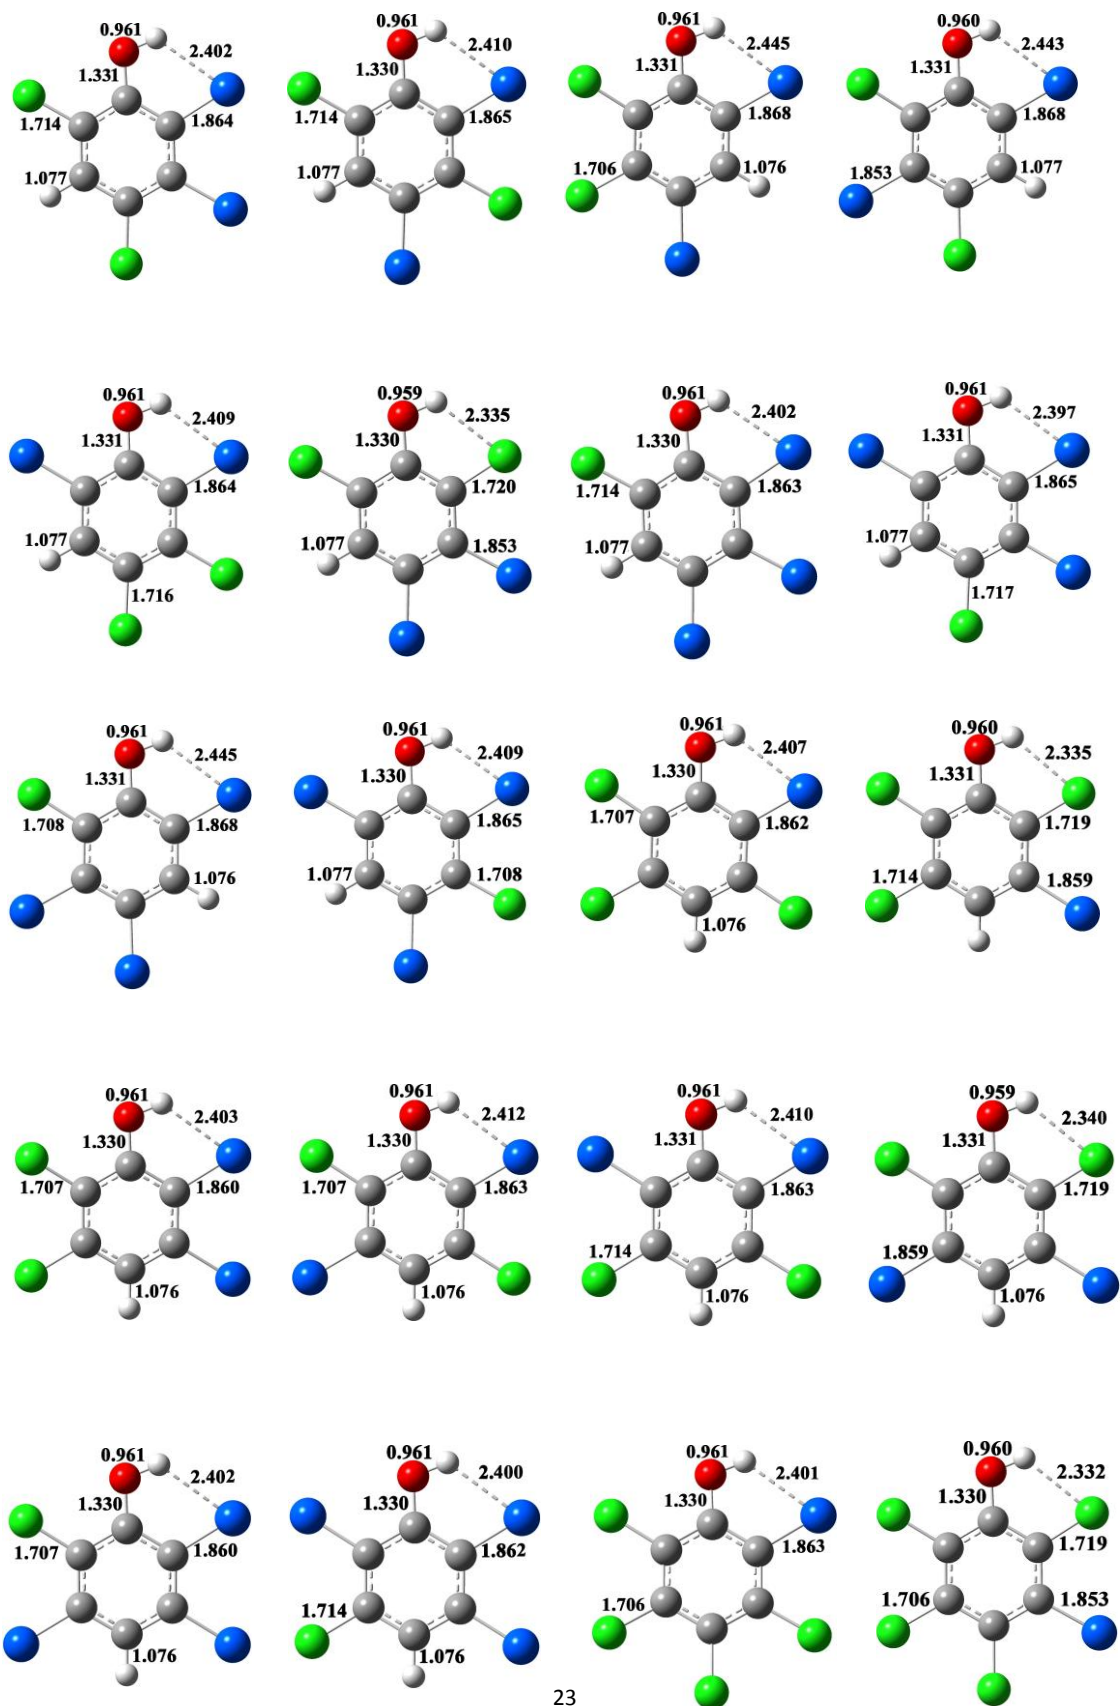

Figure S2 *Cont.*

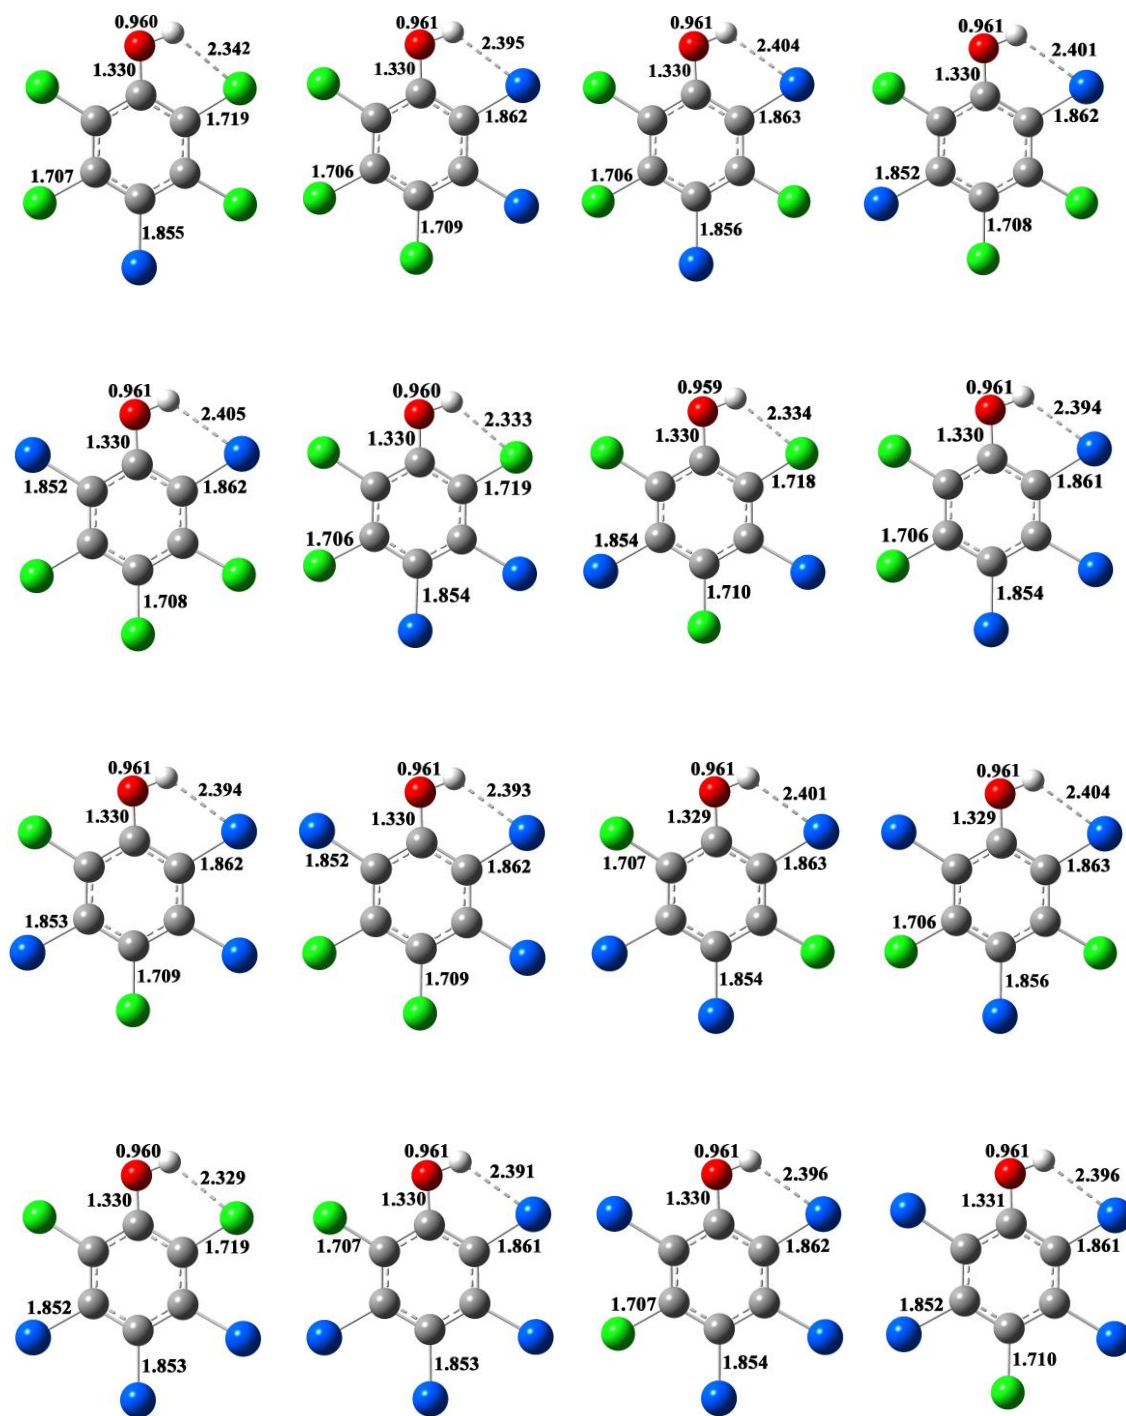

Figure S2



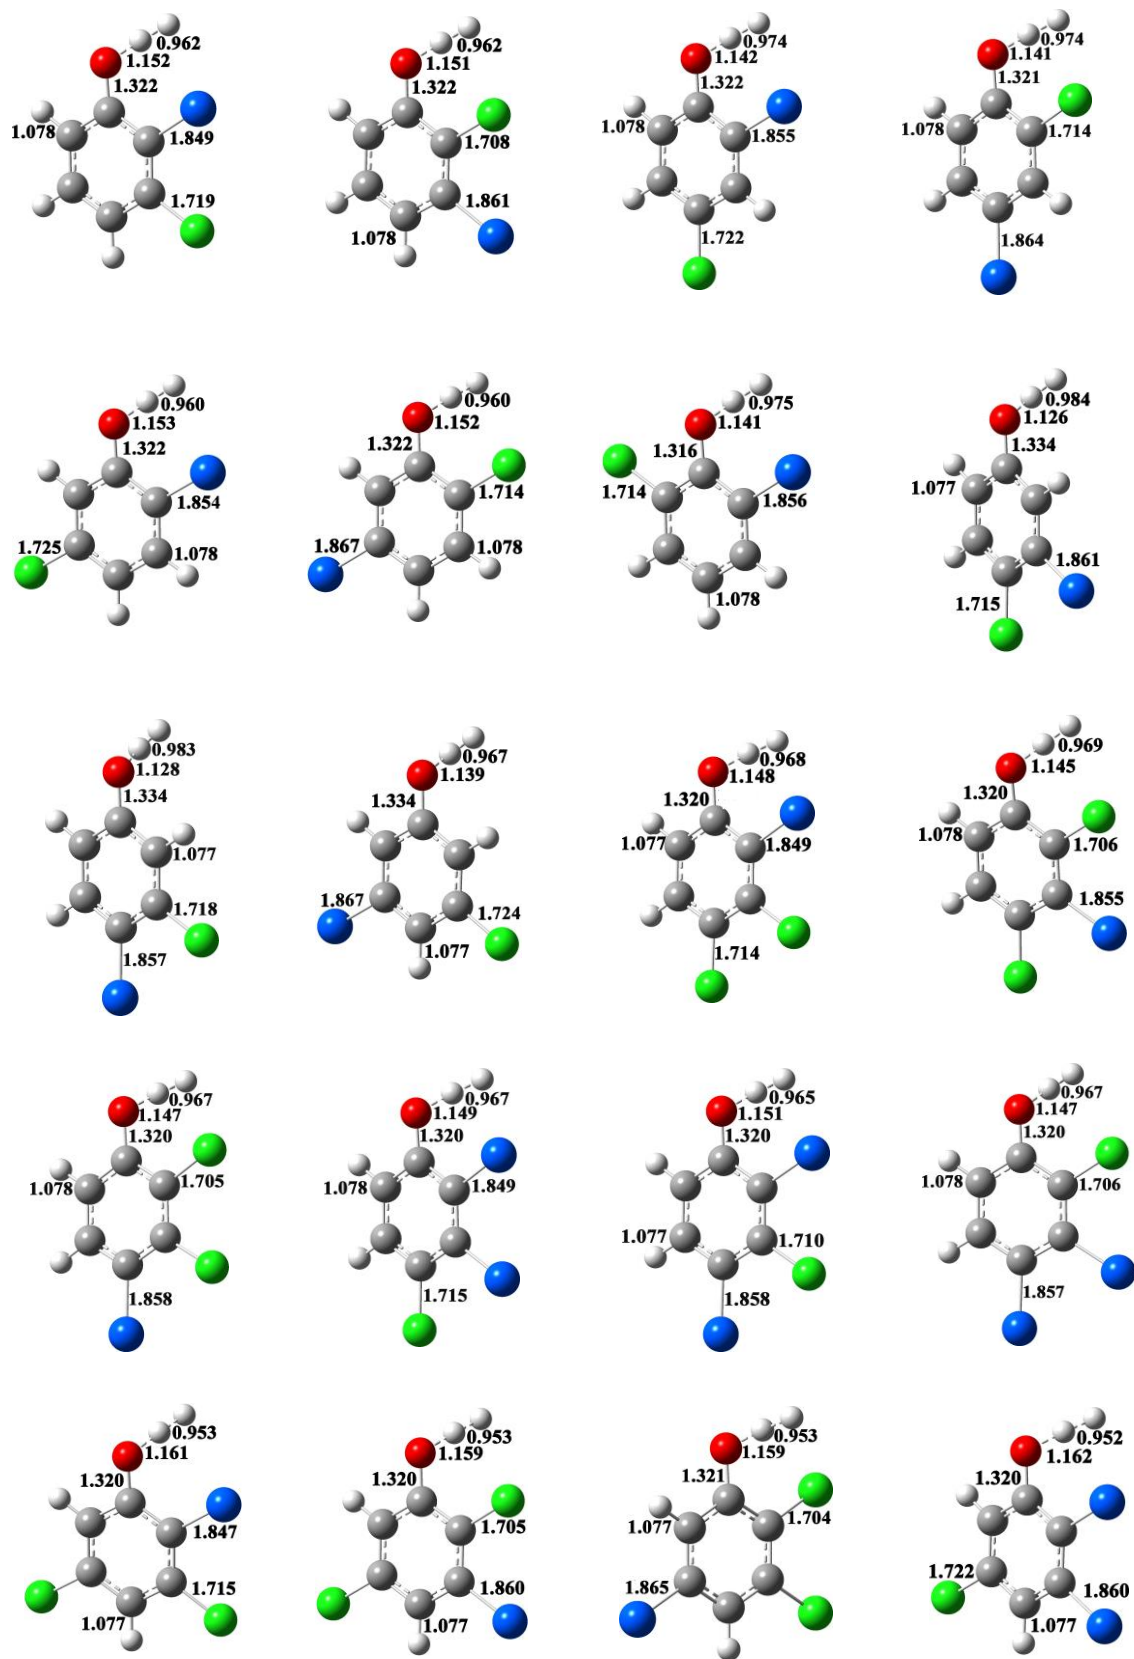

Figure S3

Figure S3 *Cont.*

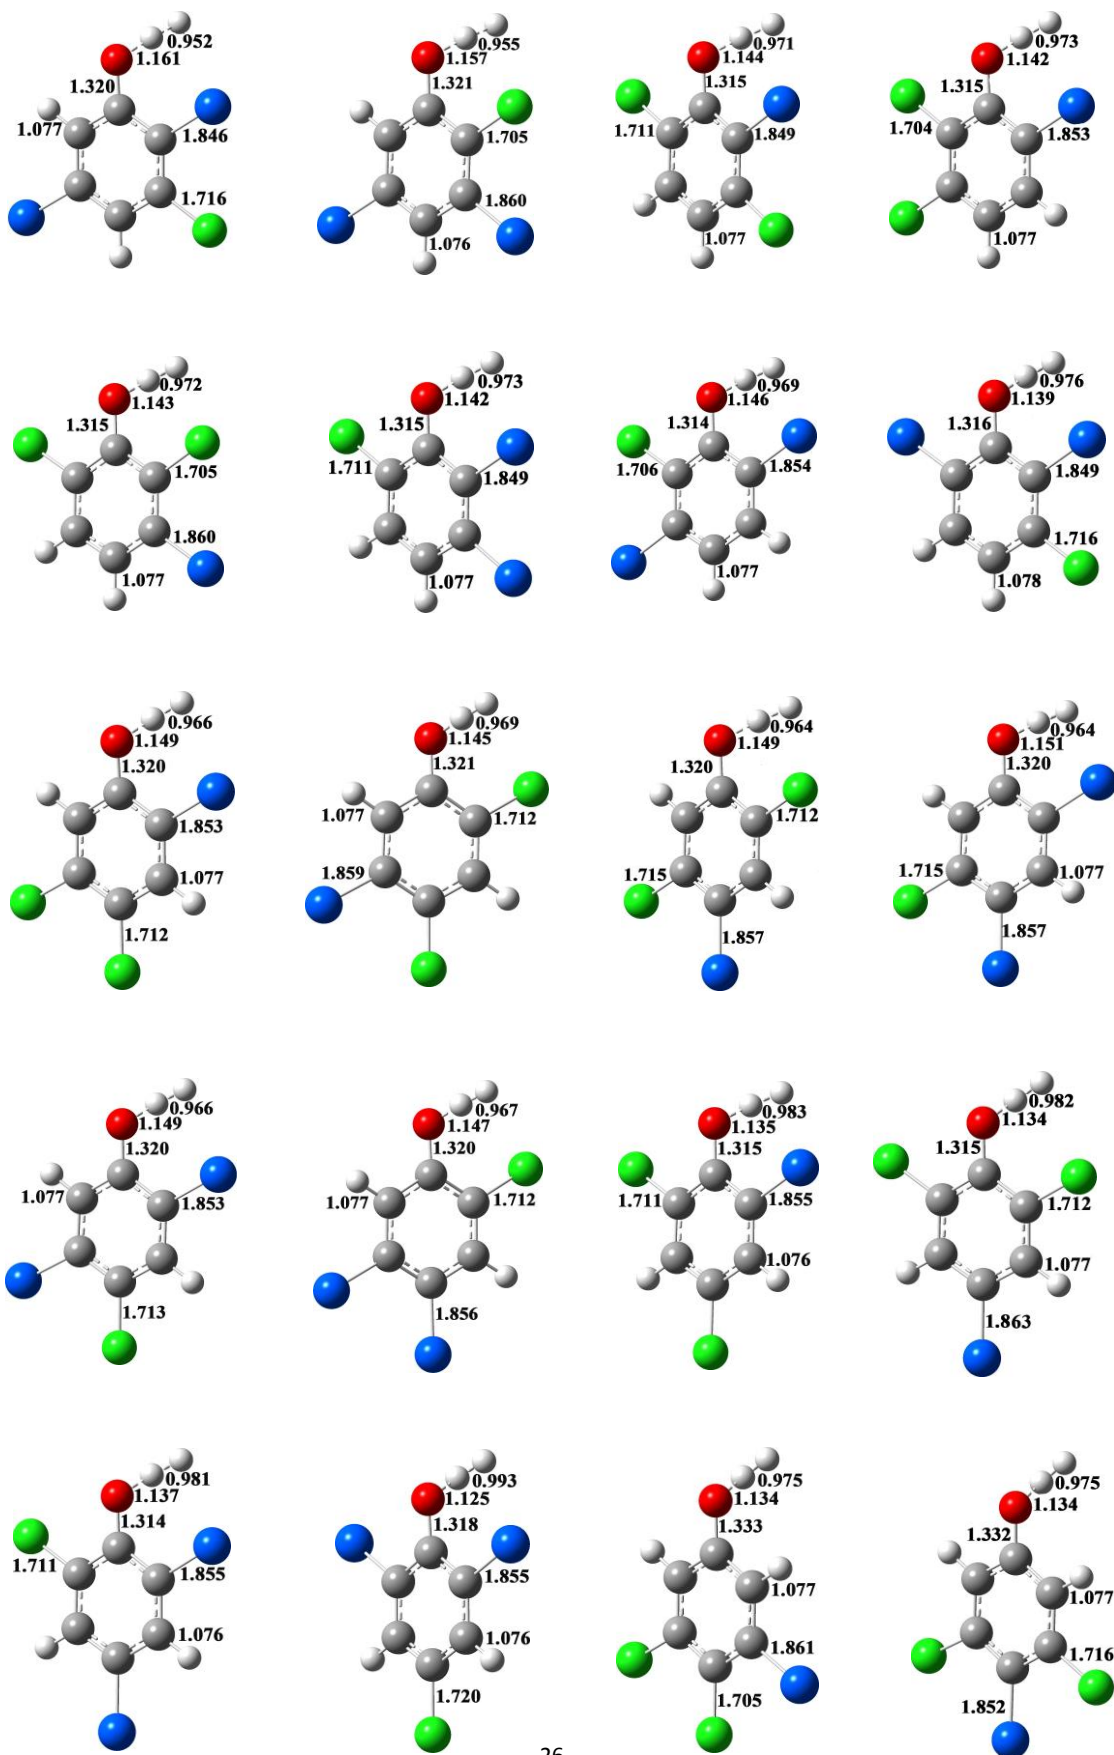

Figure S3 *Cont.*

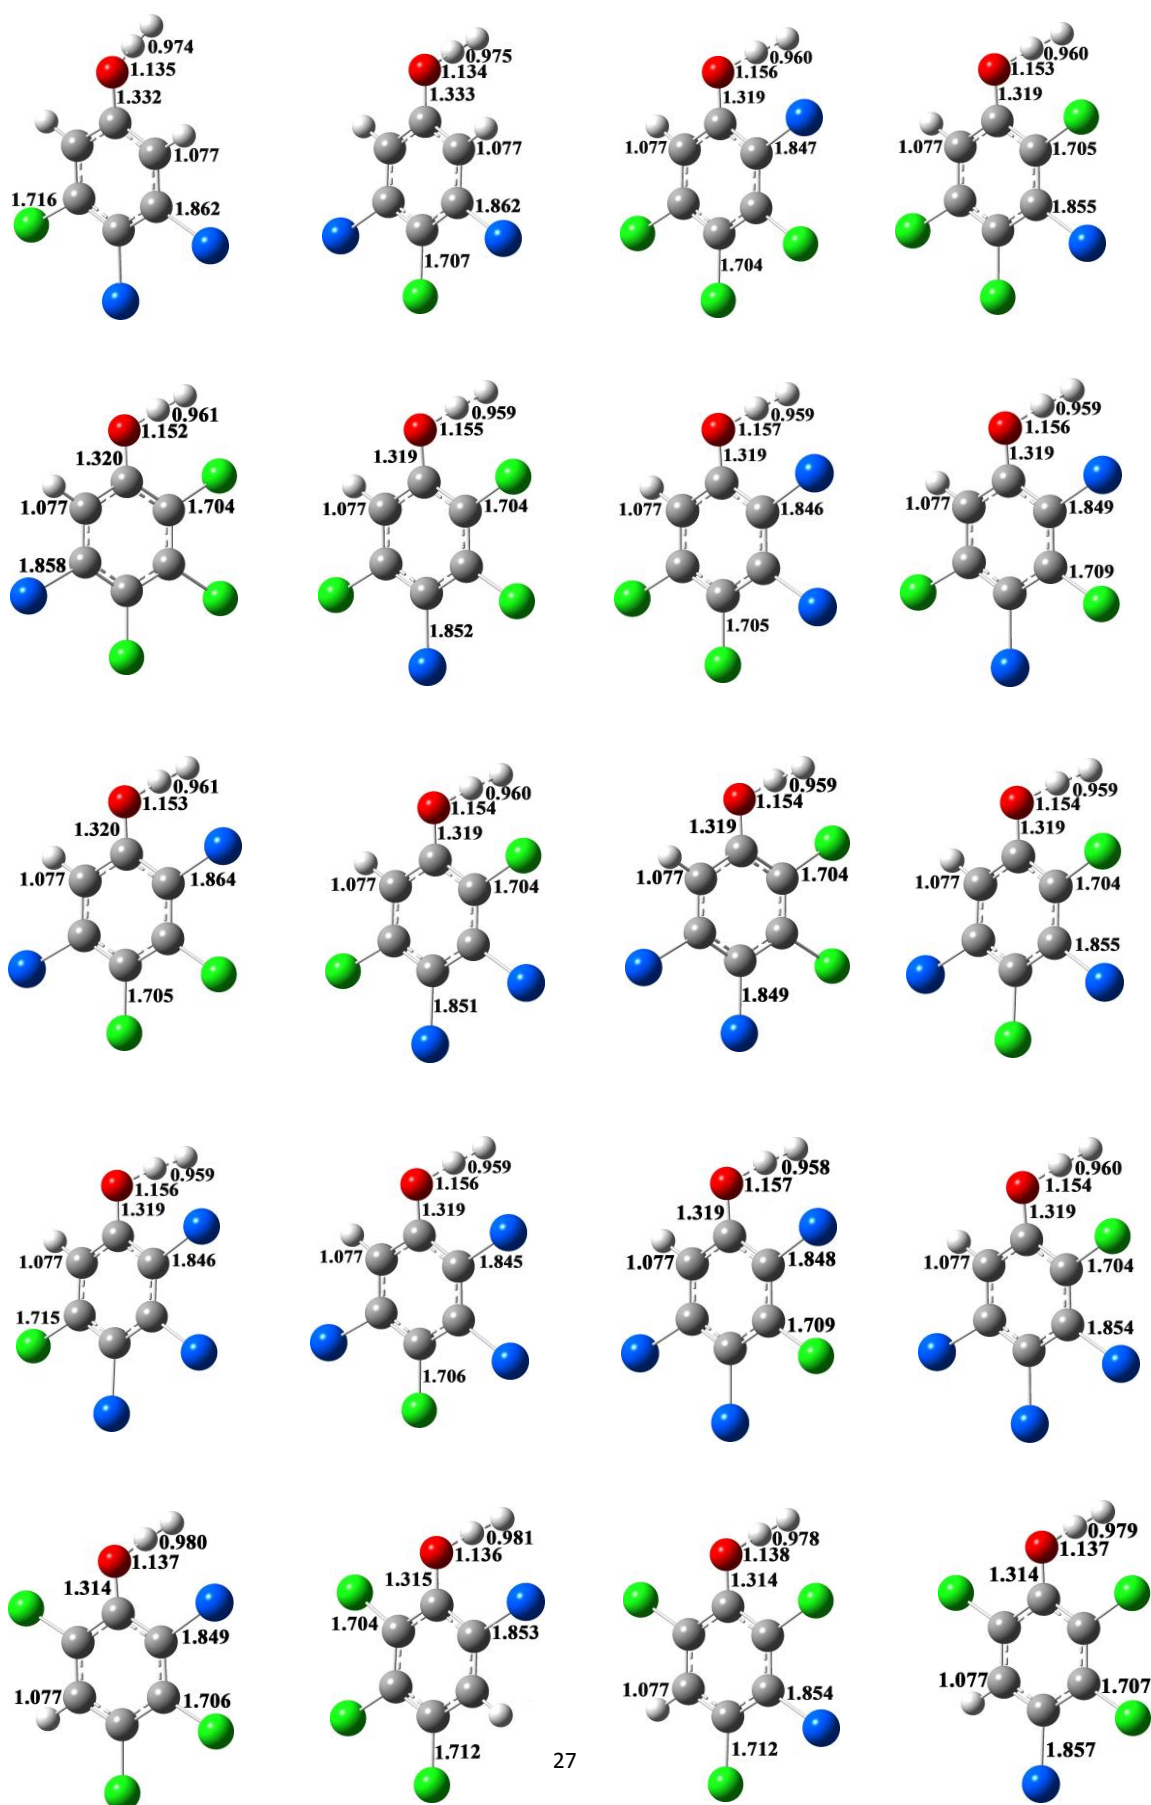

Figure S3 *Cont.*

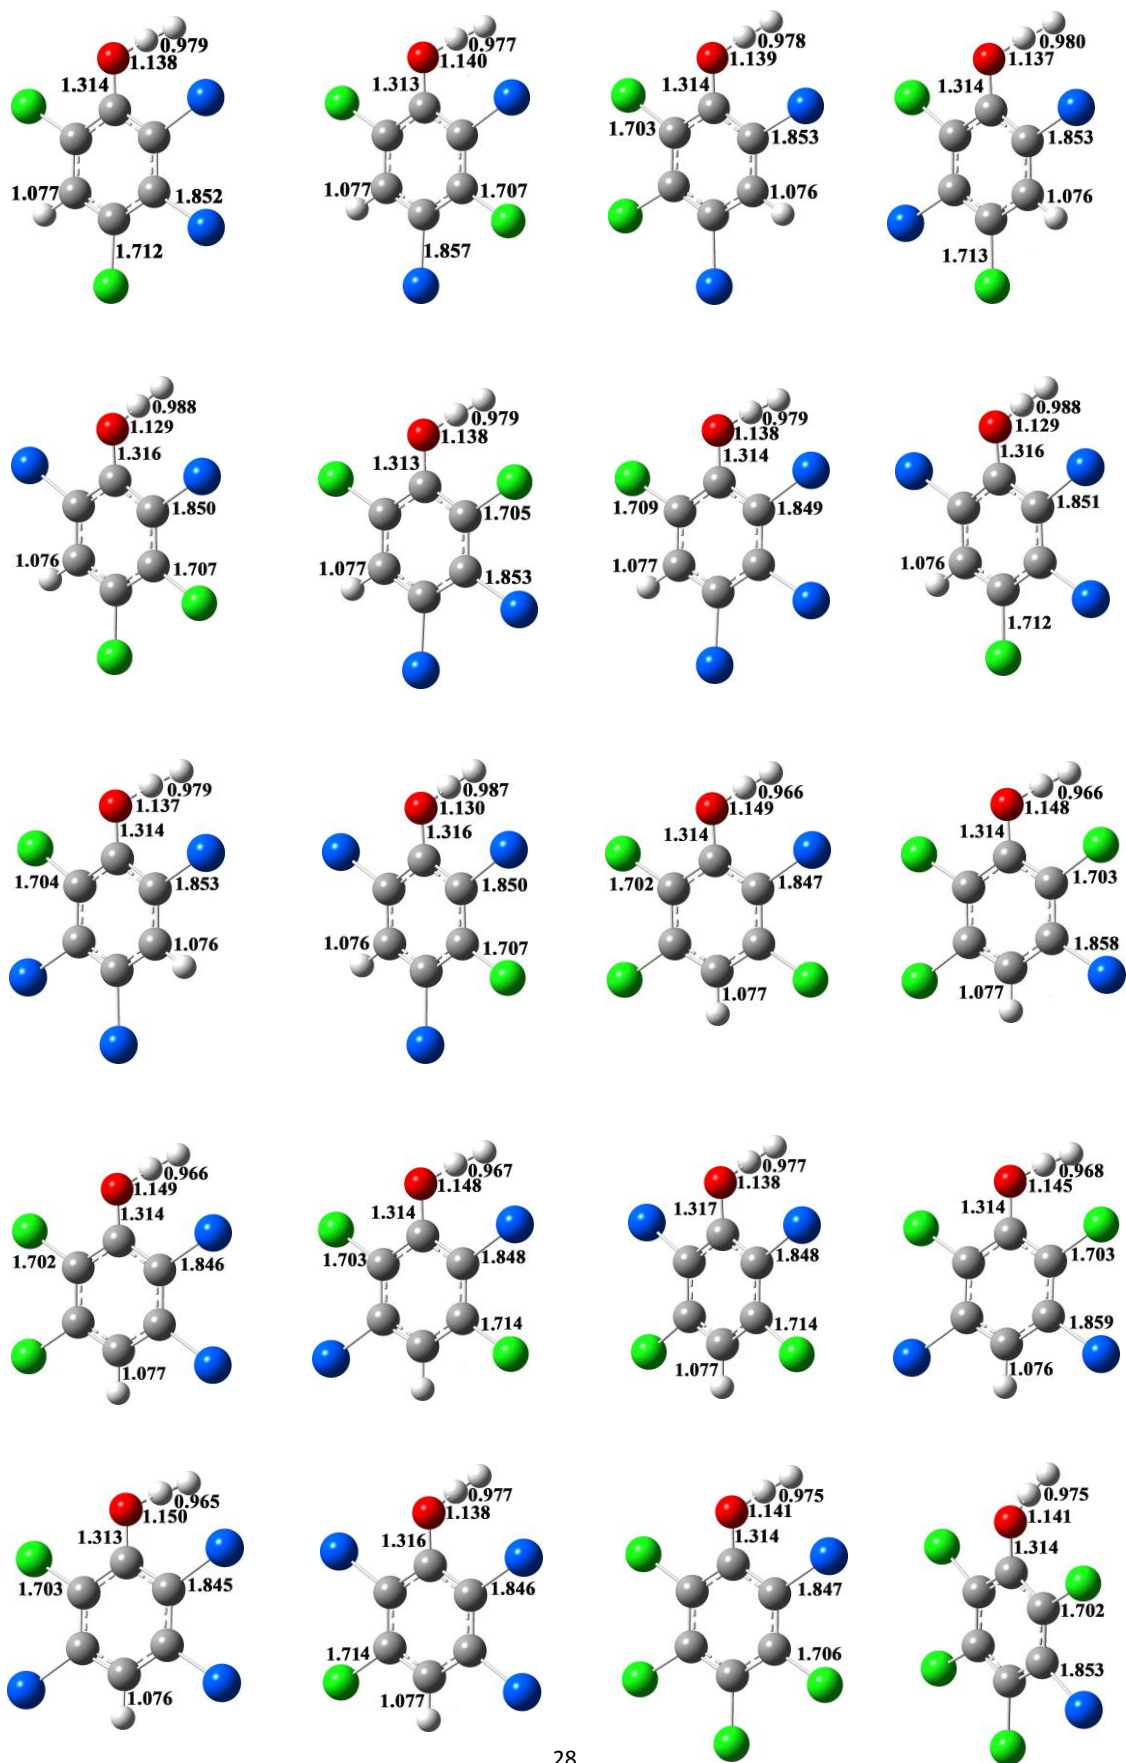

Figure S3 *Cont.*

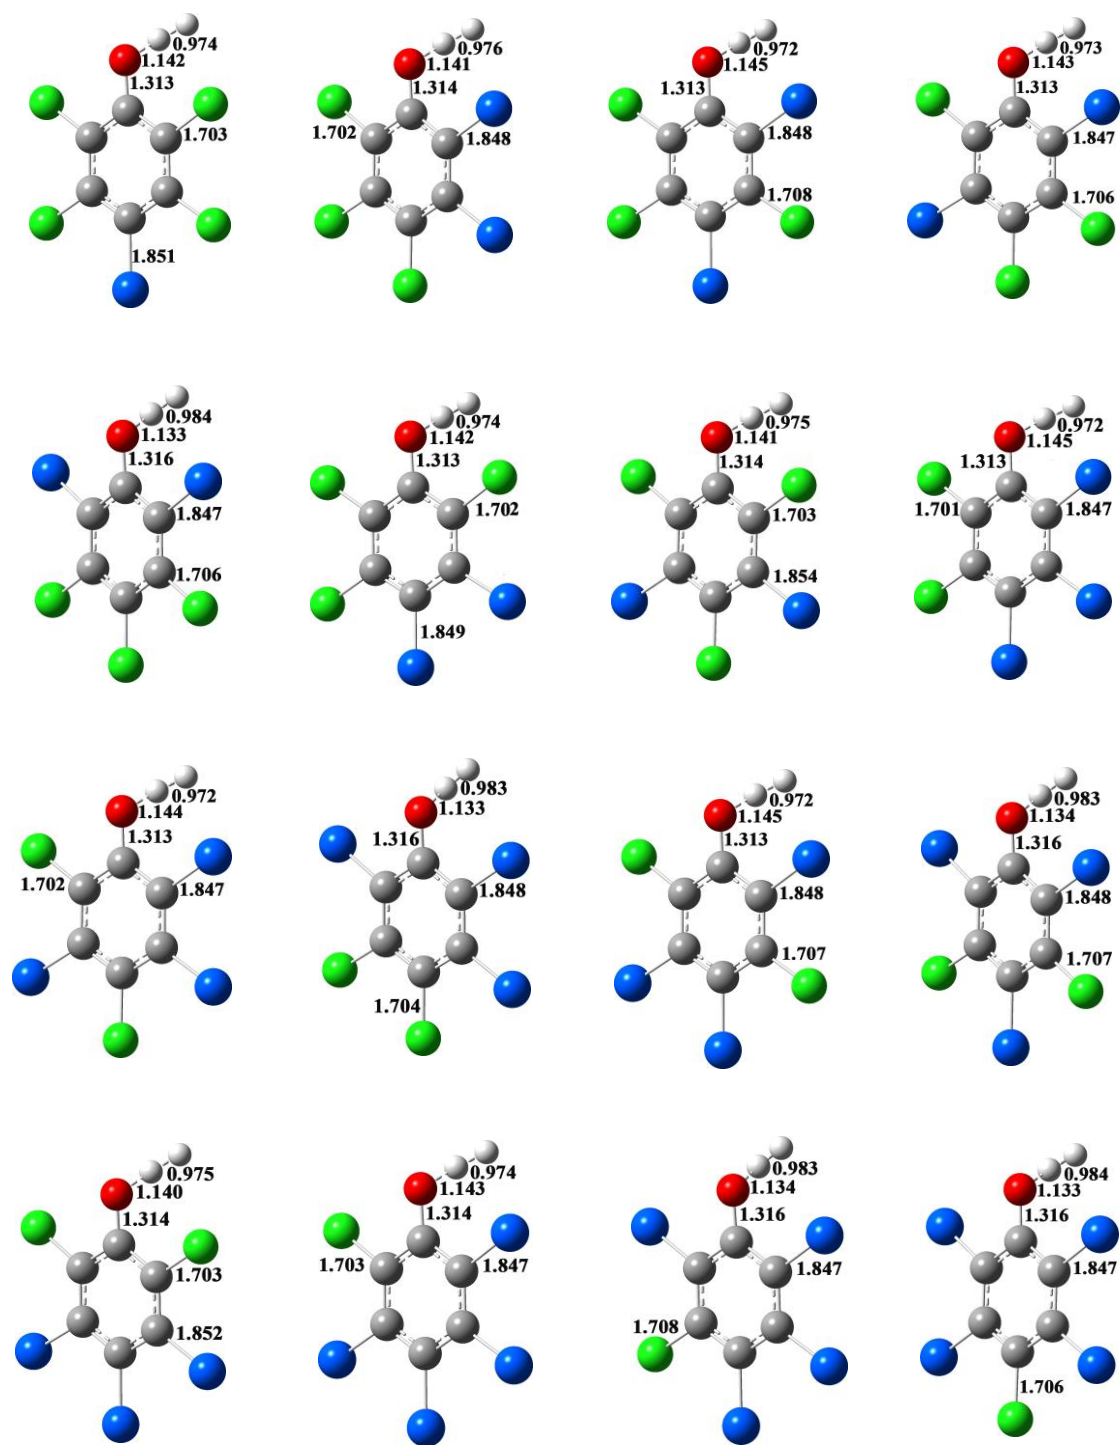

Figure S3

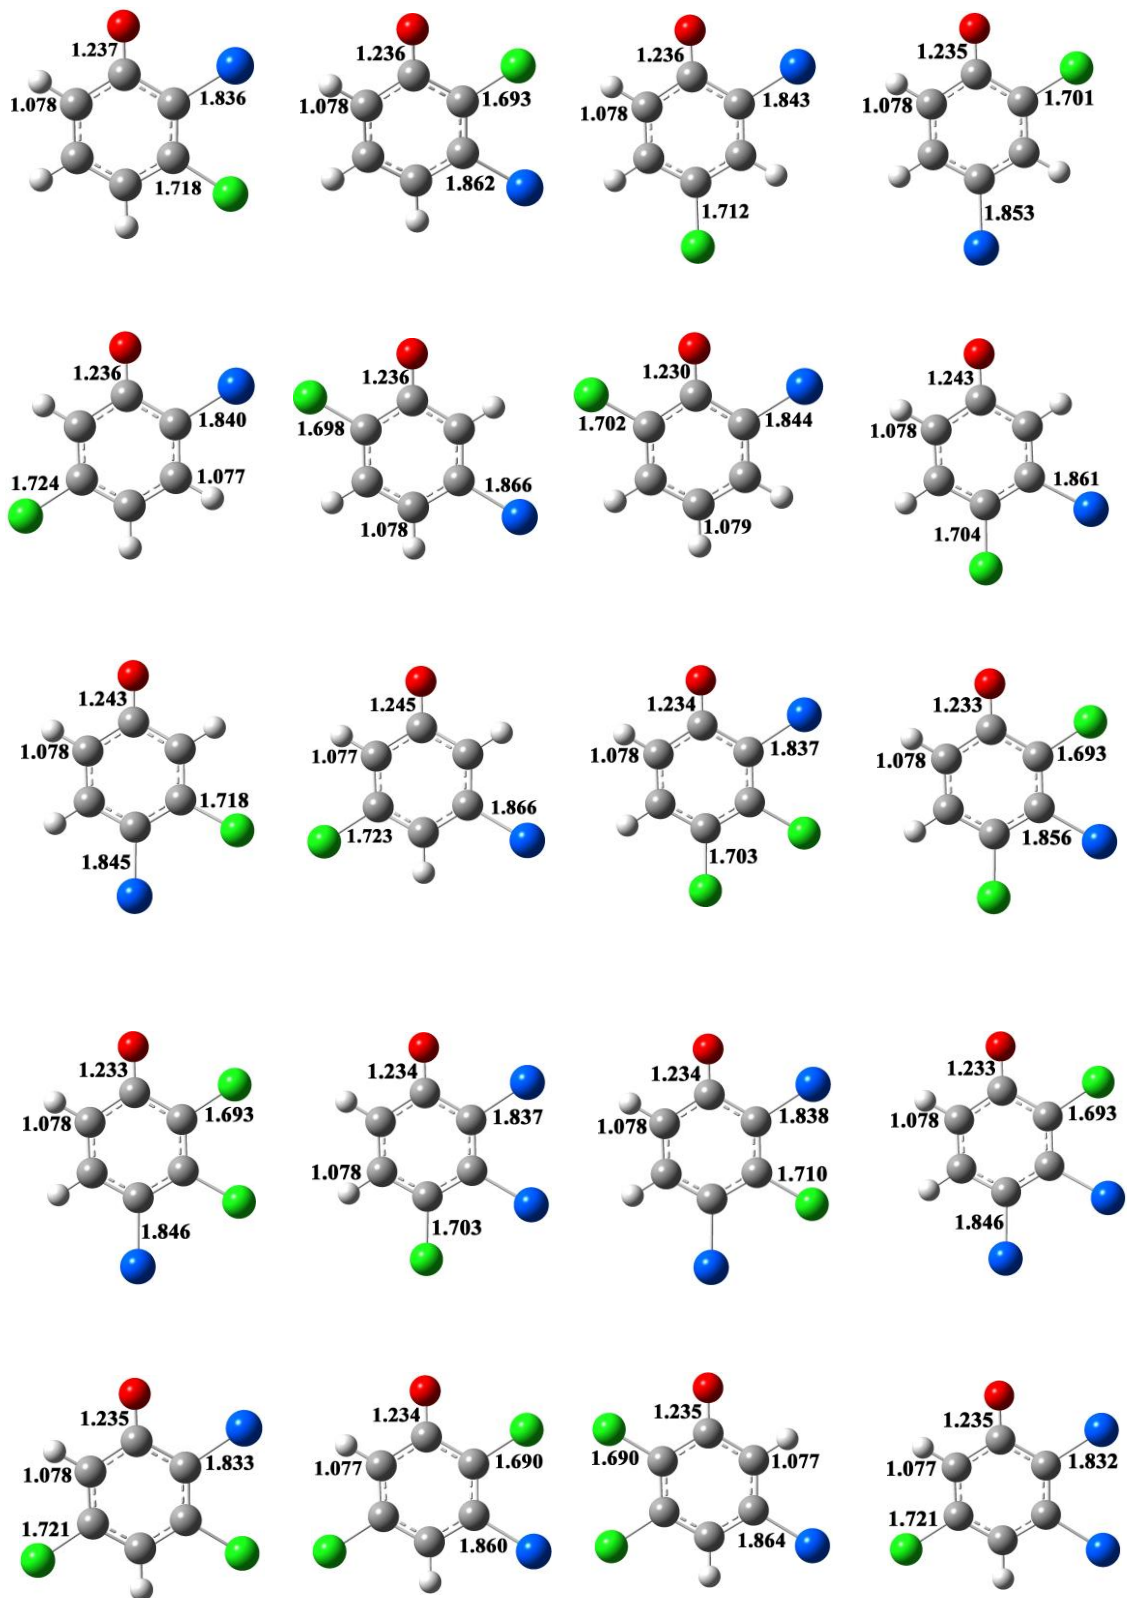

Figure S4

Figure S4 *Cont.*

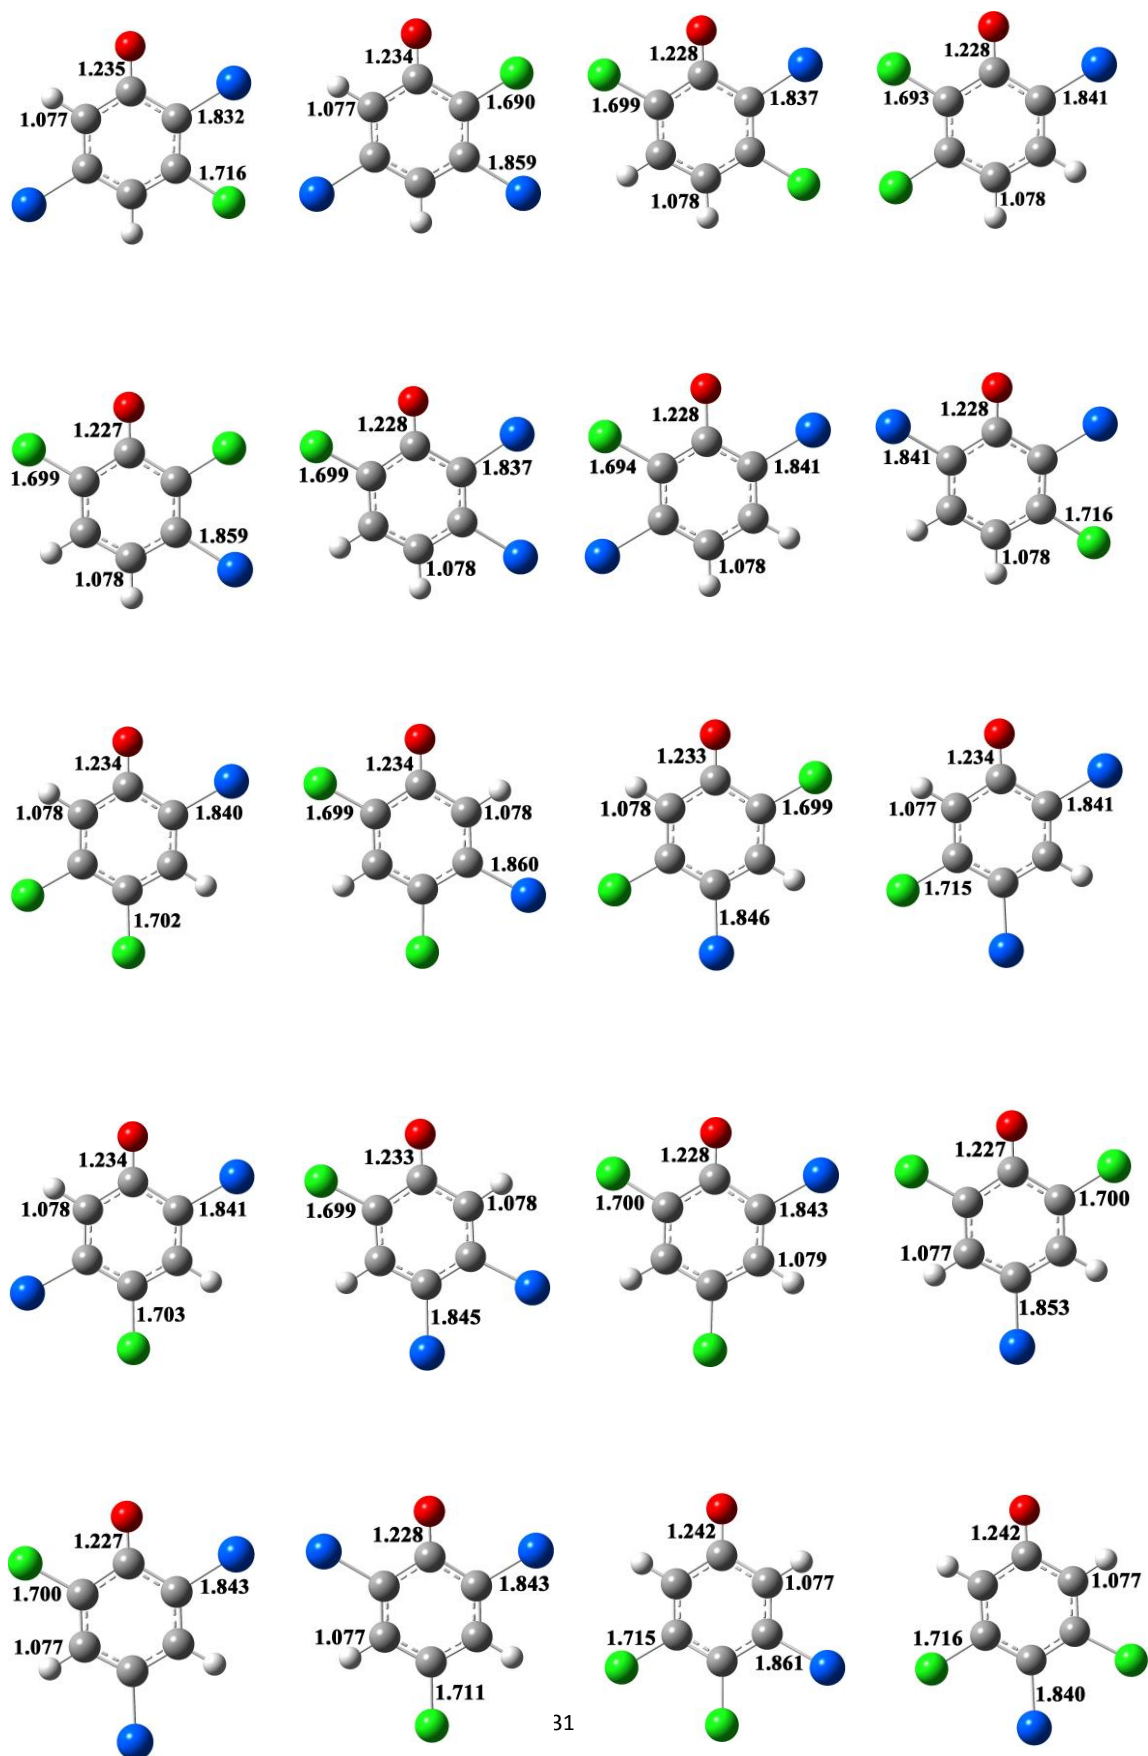

Figure S4 *Cont.*

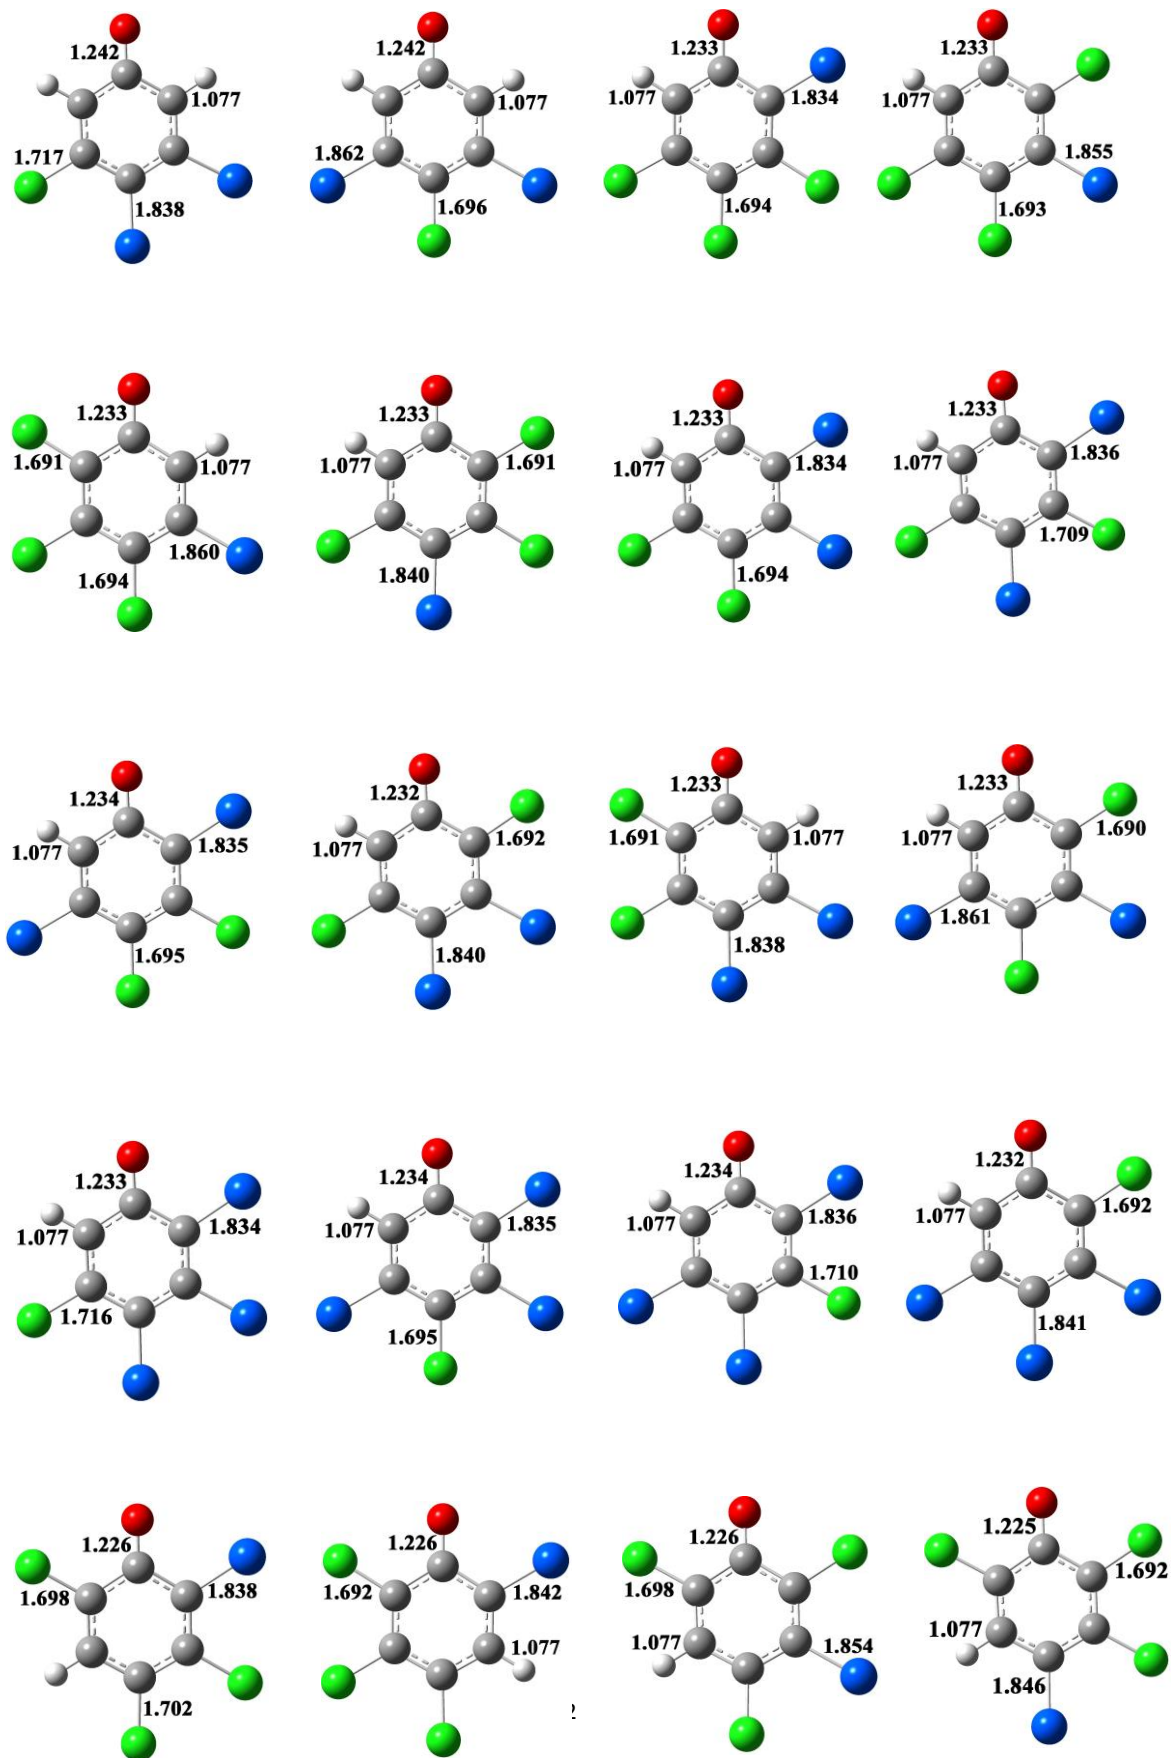



Figure S4 *Cont.*

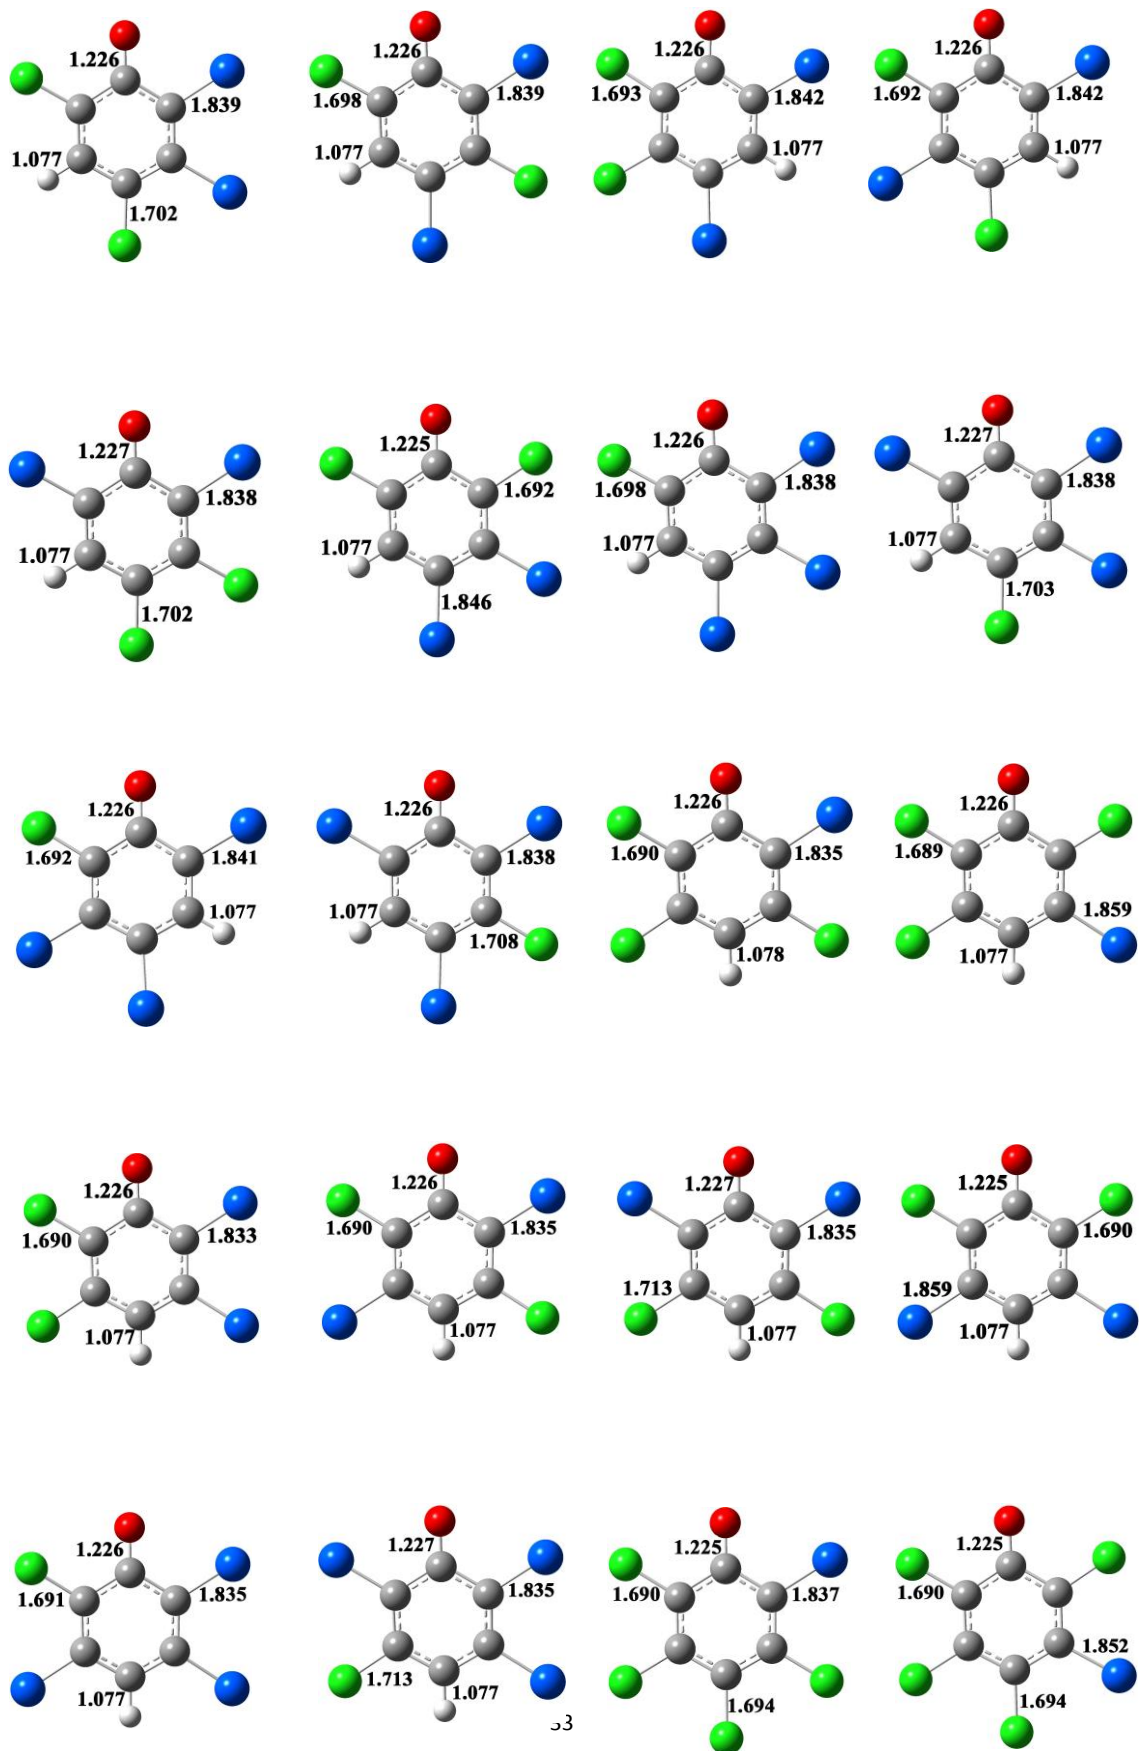

Figure S4. *Cont.*

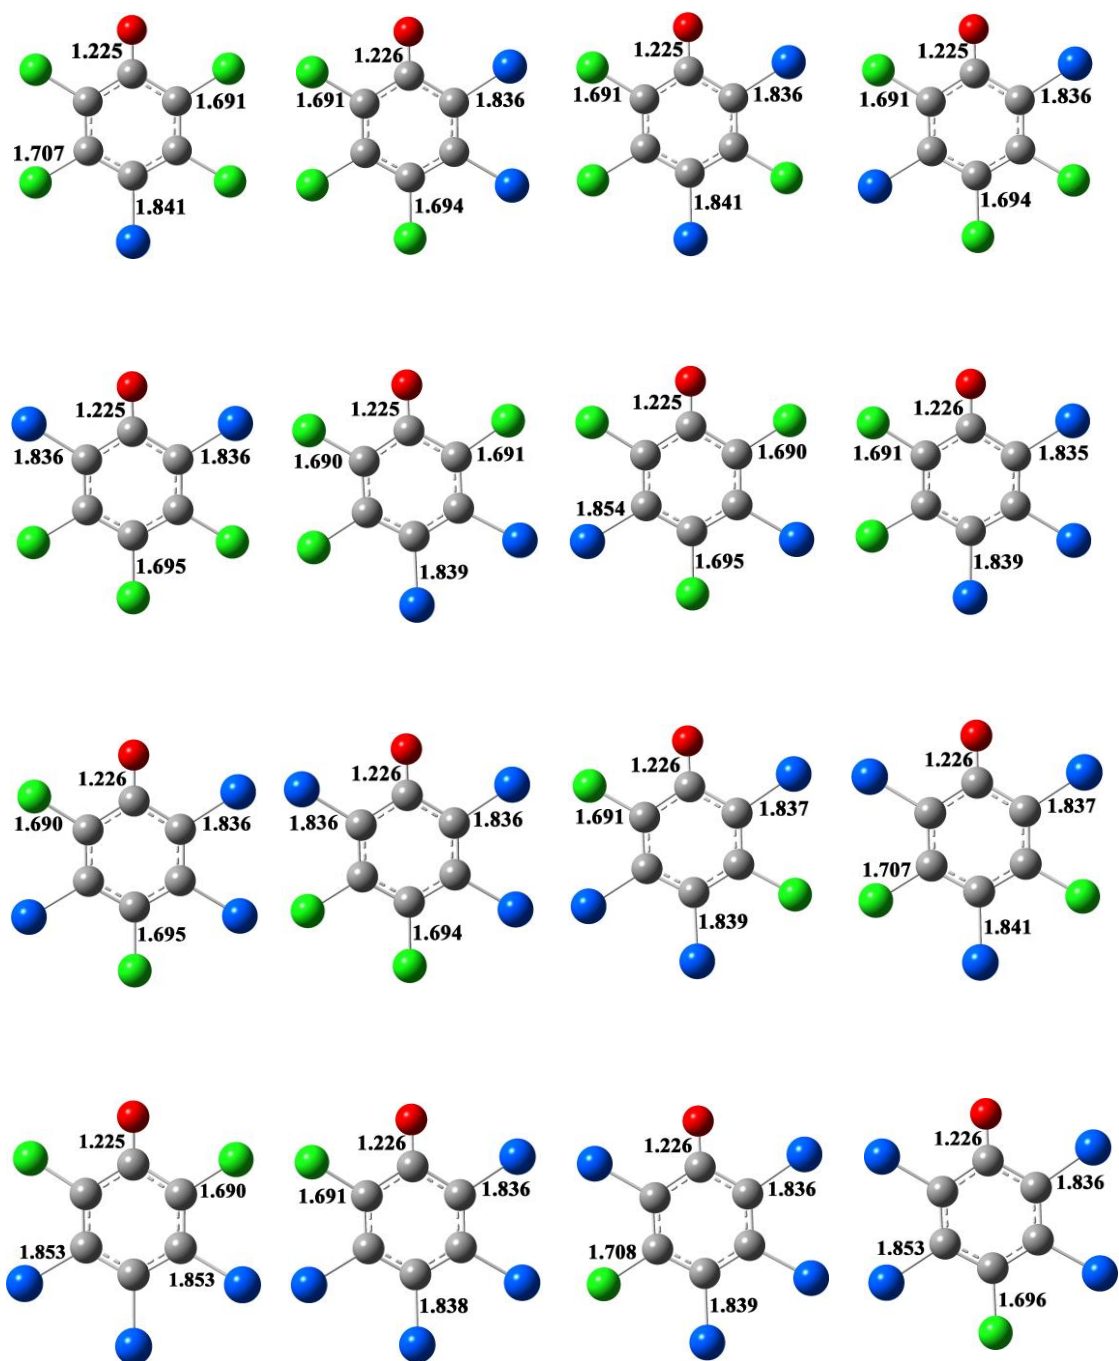

Figure S4
